# Supplementary material for: Mechanisms underlying neonate-specific metabolic effects of volatile anesthetics
Source: eLife journal article supplement (doi:10.7554/elife.65400), 2021-07-13
Supplement: supp [file elife-65400-supp-v1.zip]

Archive with 10 entries (10 files):
- elife_poa_e65400_Figure_1_figure_supplement_1.tif
- elife_poa_e65400_Figure_1_figure_supplement_2.tif
- elife_poa_e65400_Figure_1_figure_supplement_3.tif
- elife_poa_e65400_Figure_5_figure_supplement_1.tif
- elife_poa_e65400_Figure_6_figure_supplement_1.tif
- elife_poa_e65400_Figure_6_figure_supplement_2.tif
- elife_poa_e65400_Figure_6_figure_supplement_3.tif
- elife_poa_e65400_Figure_6_figure_supplement_4.tif
- elife_poa_e65400_Source_data_1.xlsx
- elife_poa_e65400_Transparent_Reporting_File.pdf
