# Supplementary material for: Mechanisms underlying neonate-specific metabolic effects of volatile anesthetics
Source: eLife journal article supplement (doi:10.7554/elife.65400), 2021-07-13
Supplement: supp [file elife-65400-supp-v1.zip › elife_poa_e65400_Source_data_1.xlsx]

## Sheet: Notes
	Figure source data provided here
	For details on treatment conditions, etc, see figure legends and main text

## Sheet: Figure 1
Panel A - Baseline BHB by age
Age
Postnatal Day 7	2.2	2.1	2	2.4	2	2.2	1.9	1.9	1.9	1.3	1.6	1.9	2.3	1.8	1.9	1.6	2.3
Postnatal Day 30	0.7	1	0.9	0.9	1.9	0.7	0.8	0.8	0.9	0.7	1.4	0.7	0.6	0.5				0.7	1.4	0.7	0.6	0.5
Postnatal Day 60	0.5	0.7	0.4	0.4	0.6	0.6	0.3	0.4	0.4
Panel B - Baseline glucose by age
Age
Postnatal Day 7	201	142	180	145	159	175	182	126	173	128	163	167	134	148
Postnatal Day 30	228	234	277	245	286	211	193	240	180	301	189	201	213
Postnatal Day 60	247	267	351	273	221	249	204	207	236
Panel C-D - Blood BHB as a function of time in P7 neonates exposed to 1.5% isoflurane or control conditions
Time	Control conditions
T=0	2.2	2.1	2	2.4	2	2.2	1.9	1.9	1.9	1.3	1.6	1.9	2.3	1.8	1.9	1.6	2.3
15 min	1.7	1.8	0.9	1.9	2	2.2
30 min	2.6	2.4	2	2.2	1.4	1.4	1.4	1.4	1.2	1.8	1.2	1.2	1.5	1.6	1.1	1.6	2.2	2.3	1.6	1.4	1.4	1.8	1.6	1.8	1.6	1.7
60 min	3.2	1.7	2.3	2	2.3	2.6
120 min	3.1	2.7	2.6
Time	1.5% Isoflurane
T=0	2.2	2.1	2	2.4	2	2.2	1.9	1.9	1.9	1.3	1.6	1.9	2.3	1.8	1.9	1.6	2.3
7.5 min	1.4	1.6
15 min	0.9	1.3	1.4	1	1.3
30 min	1.4	1.1	0.8	0.7	0.9	1	1.6	0.7	0.6	0.6	0.5	1.1	0.8	1.9
60 min	0.9	0.8	0.8	0.7	0.6	0.6	1.1
120 min	1.1	0.7	0.7	0.6	0.6	0.5	0.6	0.6
Panel E-F - Blood BHB as a function of time in P30 adolescent mice exposed to 1.5% isoflurane or control conditions
Time	Control conditions
T=0	0.7	1	0.9	0.9	1.9	0.7	0.8	0.8	0.9	0.6	0.9	0.7	0.8	0.6	0.4	0.6
60 min	0.9	1.5	0.6	1.1
120 min	0.9	2.2	0.8	1.5
Time	1.5% isoflurane
T=0	0.7	1	0.9	0.9	1.9	0.7	0.8	0.8	0.9	0.6	0.9	0.7	0.8	0.6	0.4	0.6
60 min	0.9	0.4	0.9	0.8	1	0.9
120 min	1	1.8	1.3	0.8	1	1.6
Panel G-H - Blood glucose as a function of time in P7 neonates exposed to 1.5% isoflurane or control conditions
Time	Control conditions
T=0	201	142	180	145	159	175	182	126	173	128	163	167	134	148
15 min	170	130	120	140	135	124	132
30 min	182	151	134	109	146	110	99	101	124	117	118	114	138	148	139	130	192	146	155	119	101	140	127	115
60 min	122	128	125	101	113	139
120 min	91	121	83
Time	1.5% Isoflurane
T=0	201	142	180	145	159	175	182	126	173	128	163	167	134	148
7.5 min	184	166
15 min	194	196	177	195	166
30 min	222	195	147	196	149	132	88	149	153	125	156	130	131	141
60 min	94	92	92	96	90	112	126
120 min	83	0	45	53	24	37	0	40
Panel I-J - Blood glucose as a function of time in P30 adolescent mice exposed to 1.5% isoflurane or control conditions
Time	Control conditions
T=0	228	234	277	245	286	211	193	240	175	170	207	160	174	180	301	189	201	213
60 min	224	277	212	217
120 min	204	208	186	211
Time	1.5% Isoflurane
T=0	228	234	277	245	286	211	193	240	175	170	207	160	174	180	301	189	201	213
60 min	195	313	162
120 min	334	160	179
Panel K-L - Blood glucose in glucose injected P7 neonates
Time	Glucose injected
T=0	201	142	180	145	159	175	182	126	173	128	163	167	134	148
15 min	571	376	362
30 min	598	344	340
60 min	314	360	538
Control treated and 1.5% isoflurane treated data provided in panels G-H
Panel M-N - BHB in glucose injected P7 neonates
Time	Glucose injected
T=0	2.2	2.1	2	2.4	2	2.2	1.9	1.9	1.9	1.3	1.6	1.9	2.3	1.8	1.9	1.6	2.3
15 min	1.1	1.3	1.2
30 min	0.8	0.8	1
60 min	0.6	0.7	0.6
Control treated and 1.5% isoflurane treated data provided in panels C-D
Panels O-P - BHB in BHB injected P7 neonates
Time	BHB injected
T=0	2.2	2.1	2	2.4	2	2.2	1.9	1.9	1.9	1.3	1.6	1.9	2.3	1.8	1.9	1.6	2.3
60 min	6.6	6.1	8	8	7.8	7.1
120 min	6.3	6.3	5.1	4.5	6.1
Control treated and 1.5% isoflurane treated data provided in panels C-D
Panels Q-R - Glucose in BHB injected P7 neonates
Time	BHB injected
T=0	201	142	180	145	159	175	182	126	173	128	163	167	134	148
60 min	116	107	164	172	214
120 min	51	65	84	77	64
Control treated and 1.5% isoflurane treated data provided in panels G-H

## Sheet: Figure 1-figure supplement 1
Panel A-C - Blood lactate in isoflurane exposed neonatal mice
Time	Control treated
T=0	2.3	4.3	1.5	4.6	2.3	2.4	1.9	2.6	1.9	1.8
15 min	1.3	2.8	2.3
30 min	1	1.2	0.7	1.3	1.8	1.6	2.2	1.6	0.7	2	1.4	1.2	1.8
60 min	1.1	2
120 min	1.1	1.7	1.5
Time	1% isoflurane exposed
T=0	2.3	4.3	1.5	4.6	2.3	2.4	1.9	2.6	1.9	1.8
30 min	2.2	2.1	2.6	2.3	2.3	1.8
60 min	1.7	2.4
120 min	3.6	3.5	2.2
Time	1.5% isoflurane exposed
T=0	2.3	4.3	1.5	4.6	2.3	2.4	1.9	2.6	1.9	1.8
15 min	2.3	2	2.6
30 min	3.5	3.5
60 min	6.6	3.2	6	3.5			6.2
120 min	7.5	5.8	5.9	5.2	5.9	5.6	9.3
Panel D - Blood glucose in isoflurane exposed neonatal mice
Time	Control treated
T=0	201	142	180	145	159	175	182	126	173	128	163	167	134	148
15 min	170	130	120	140	135	124	132
30 min	182	151	134	109	146	110	99	101	124	117	118	114	138	148	139	130	192	146	155	119	101	140	127	115
60 min	122	128	125	101	113	139
120 min	91	121	83
Time	1% isoflurane exposed
T=0	201	142	180	145	159	175	182	126	173	128	163	167	134	148
7.5 min	173	176	146
15 min	158	146	138
30 min	150	179	135	147	179	122	190	141	113	123	120	111	137	96	121	101	124	119	102	105
60 min	156	210	146	157	121	130	163	98	86
120 min	137	138	152	181	145	117	112	102
Time	1.5% isoflurane exposed
T=0	201	142	180	145	159	175	182	126	173	128	163	167	134	148
7.5 min	184	166
15 min	194	196	177	195	166
30 min	222	195	147	196	149	132	88	149	153	125	156	130	131	141
60 min	94	92	92	96	90	112	126
120 min	83	0	45	53	24	37	0	40

## Sheet: Figure 1-figure supplement 2
Panel A - Blood insulin (pg/mL)
30 min fasted	30 min 1% iso	30 min 1.5% iso
7074.34	478.65	1662.74
1322	671.5	268.88
2523.91	558.15	1698.54
Panel B - Blood c-peptide (pg/mL)
30 min fasted	30 min 1% iso	30 min 1.5% iso
10544.2	2796.57	4375.24
6436.04	2505.39	1781.45
5325.66	2722.57	4735.65
Panel C - Blood GIP (pg/mL)
30 min fasted	30 min 1% iso	30 min 1.5% iso
3785.82	500.92	1083.46
2227.74	662.86	237.73
3404.52	402.54	858.33
Panel D - Blood Glucagon (pg/mL)
30 min fasted	30 min 1% iso	30 min 1.5% iso
181.87	188.91	226.95
166.97	212.8	137.82
182.58	206.93	181.16
Panel D - Blood PP (pg/mL)
30 min fasted	30 min 1% iso	30 min 1.5% iso
54.58	66.87	63.25
53.31	62.04	72.18
58.96	69.83	60.2

## Sheet: Figure 1-figure supplement 3
Panel A - Blood BHB by time exposed to air or 100% oxygen
Time	Air
T=0	2.2	2.1	2	2.4	2	2.2	1.9	1.9	1.9	1.3	1.6	1.9	2.3	1.8	1.9	1.6	2.3
15 min	1.7	1.8	0.9	1.9	2	2.2
30 min	2.6	2.4	2	2.2	1.4	1.4	1.4	1.4	1.2	1.8	1.2	1.2	1.5	1.6	1.1	1.6	2.2	2.3	1.6	1.4	1.4	1.8	1.6	1.8	1.6	1.7
60 min	3.2	1.7	2.3	2	2.3	2.6
120 min	3.1	2.7	2.6
180 min	3	2.3
Time	100% oxygen
T=0	2.2	2.1	2	2.4	2	2.2	1.9	1.9	1.9	1.3	1.6	1.9	2.3	1.8	1.9	1.6	2.3
60 min	2.4	2.3
120 min	2.4	2.5
180 min	2.8	2.4	2.6	3.3
Panel A - Blood glucose by time exposed to air or 100% oxygen
Time	Air
T=0	201	142	180	145	159	175	182	126	173	128	163	167	134	148
15 min	170	130	120	140	135	124	132
30 min	182	151	134	109	146	110	99	101	124	117	118	114	138	148	139	130	192	146	155	119	101	140	127	115
60 min	122	128	125	101	113	139
120 min	116	106
180 min	57	67	57	77
Time	100% oxygen
T=0	201	142	180	145	159	175	182	126	173	128	163	167	134	148
60 min	126	108
120 min	93	114
180 min	132	108	148	103

## Sheet: Figure 2
Panel A - BHB by time in fasted and 1.5% isoflurane exposed animals
Time	Control treated (i.e. fasted)
60 min	3.2	1.7	2.3	2	2.3	2.6
120 min	3.1	2.7	2.6
180 min	3	2.3
240 min	2.8	2.3	3.2	3.3
Time	Control treated (i.e. fasted)
60 min	0.9	0.8	0.8	0.7	0.6	0.6	1.1
120 min	1.1	0.7	0.7	0.6	0.6	0.5	0.6	0.6
180 min	1.4	1.5	1.3	1.1	0.7	0.6	0.5	1.1
240 min	0.9	0.9	1.3	1.3	1	1	1.3
Panel B - Blood BHB in P30 animals at baseline and with 180 min of control conditions or exposure to 1.5% isoflurane
Group
Baseline	0.7	1	0.9	0.9	1.9	0.7	0.8	0.8	0.9	0.6	0.9	0.7	0.8	0.6
180 min control conditions	1.1	2.4	1.2	1.3
180 min 1.5% isoflurane	2.4	1.3	1.6	1.1	1	1.4
Panels C and D - Impact of 1.5% isoflurane on BHB in blood of control diet fed and ketogenic diet fed adolescent (P30) mice
Time	Control fed, control treated (i.e. fasted)
0 min	0.7	1	0.9	0.9	1.9	0.7	0.8	0.8	0.9	0.6	0.9	0.7	0.8	0.6	0.4	0.6
15 min	0.8	1.1
30 min	0.8	1.2
60 min	0.9	1.5	0.6	1.1
Time	Control fed, 1.5% isoflurane
0 min	0.7	1	0.9	0.9	1.9	0.7	0.8	0.8	0.9	0.6	0.9	0.7	0.8	0.6		0.8	0.6	0.6
15 min	0.6	1.3	1
30 min	0.7	1.1	1.1
60 min	0.9	0.4	0.9	0.8	1	0.9
Time	Ketogenic Diet fed, 1.5% isoflurane
0 min	5.8	4.8	3.5	2.9	2.6	2.6	4.5	1.9	2.1
7.5 min	4.7	3.3	2.3	3.1	3.2	2.4	6.4	2.4	2
15 min	4.4	3.2	2.6			1.8	5.2	2.6	1.9
30 min	4.4	2.6	2.2	4.6	4	1.8	6.2	3.2	1.8
60 min	3.6	2.1	2.4	4.4	7.2	1.2	7.3	3.8	2.9
Panel E - BHB by age at baseline
Age (postnatal days)	7	9	11	13	15	17	19	21	23	30
	2.2	1.4	2.1	2.7	2.2	2.1	0.8	0.4	0.9	0.7
	2.1	1	2.6	2.2	2.3	3	0.9	0.6	0.9	1
	2	1.8	2.1	1.9	2.3	2.1	0.6	0.3	0.7	0.9
	2.4	1.1					1.4	0.3	0.8	0.9
	2	2.1								1.9
	2.2	1.9								0.7
	1.9									0.8
	1.9									0.8
	1.9									0.9
	1.3									0.6
	1.6									0.9
	1.9									0.7
	2.3									0.8
	1.8									0.6
	1.9
	1.6
	2.3
Panel F - BHB by age - pre vs postnatal - median at each age
Age (postnatal days)	7-17	19-30
	1.9	0.85
	1.6	0.35
	2.1	0.85
	2.2	0.8
	2.3
	2.1
Panel G - blood glucose by age at baseline
Age (postnatal days)	7	9	11	13	15	17	19	21	23	30
	201	190	211	234	165	203	222	242	223	228
	142	174	137	227	165	186	224	237	339	234
	180	185	186	171	253	196	199	176	156	277
	145	145					242	158	224	245
	159	147								286
	175	153								211
	182									193
	126									240
	173
	128									175
	163									170
	167									207
	134									160
	148									174
Panel H - BHB by age - pre vs postnatal - median at each age
Age (postnatal days)	7-17	19-30
	161	223
	163.5	206.5
	186	223.5
	227	211
	165
	196
Panel I - BHB at 1 hour +/- iso
P7 (+) Iso	P9 (+) Iso	P11 (+) Iso	P13 (+) Iso	P15 (+) Iso	P17 (+) Iso	P19 (+) Iso	P21 (+) Iso	P23 (+) Iso	P25 (+) Iso	P30 (+) Iso	P60 (+) Iso		P7 (-) Iso	P9 (-) Iso	P11 (-) Iso	P13 (-) Iso	P15 (-) Iso	P17 (-) Iso	P19 (-) Iso	P21 (-) Iso	P23 (-) Iso	P25 (-) Iso	P30 (-) Iso	P60 (-) Iso
0.9	0.8	0.8	1.1	0.8	1.6	1.1	0.7	1.1	0.6	0.9	0.3		3.2	1.6	1.6	3.6	3.3	3.3	1.4	0.8	0.8	1.4	0.9	0.4
0.8	0.8	0.7	1.6	0.9	2.4	0.8	0.3	0.8	0.4	0.4	0.3		1.7	2.3	2.1	3.1	3.2	3.2	1.7	1.2	0.7	1.3	1.5	0.8
0.8	1.1	1	1	0.9	0.7	1.1		0.5	0.5	0.9	1		2.3		1.1	2.1	2.1	3.6	1.4		1.1	0.9	0.6	0.4
0.7					0.6	1.6		0.5					2		1.4				1.2			1.5	1.1
0.6													2.3
0.6													2.6
1.1
Panel J - BHB at 1 hour +/- iso median age split
P7 -17 (+) Iso	P19 - 30 (+) Iso	P7 - 17 (-) Iso	P19 - 30 (-) Iso
0.8	1.1	2.3	1.4
0.8	0.5	1.95	1
0.8	0.65	1.5	0.8
1.1		3.1	1.35
0.9	0.9	3.2	1
1.15		3.3	0.4
Panel K - Blood glucose at 2 hours +/- iso
P7 (+) Iso	P9 (+) Iso	P11 (+) Iso	P13 (+) Iso	P15 (+) Iso	P17 (+) Iso	P19 (+) Iso	P21 (+) Iso	P23 (+) Iso	P25 (+) Iso	P30 (+) Iso	P60 (+) Iso		P7 (-) Iso	P9 (-) Iso	P11 (-) Iso	P13 (-) Iso	P15 (-) Iso	P17 (-) Iso	P19 (-) Iso	P21 (-) Iso	P23 (-) Iso	P25 (-) Iso	P30 (-) Iso	P60 (-) Iso
83	20	52	47	73	125	51	76	211	100	334	405		91	139	148	167	110	162	130	158	122	227	204	175
0	0	0	130	144	139	145		280	153	160	382		121	97	143	161	142	142	212		158	178	208	212
45	40	22	118	129	91	98		70	62	179	392		83		144		117	155	172		168			275
53		79			94			80							146
24								59
37								211
0
40
Panel L - Blood glucose at 2 hour +/- iso median age split
P7-17 (+) Iso	P19 - 30 (+) Iso	P7 -17 (-) Iso	P19 -30 (-) Iso
38.5	98	91	172
20	76	118	158
37	145.5	145	158
118		164
129	179	117	206
109.5		155

## Sheet: Figure 3
Panels A-B - BHB by isoflurane dose and time
Time	Control treated
0	2.2	2.1	2	2.4	2	2.2	1.9	1.9	1.9	1.3	1.6	1.9	2.3	1.8	1.9	1.6	2.3
15 min	1.7	1.8	0.9	1.9	2	2.2
30 min	2.6	2.4	2	2.2	1.4	1.4	1.4	1.4	1.2	1.8	1.2	1.2	1.5	1.6	1.1	1.6	2.2	2.3	1.6	1.4	1.4	1.8	1.6	1.8	1.6	1.7
Time	1.5% isoflurane treated
0	2.2	2.1	2	2.4	2	2.2	1.9	1.9	1.9	1.3	1.6	1.9	2.3	1.8	1.9	1.6	2.3
7.5 min	1.4	1.6
15 min	0.9	1.3	1.4	1	1.3
30 min	1.4	1.1	0.8	0.7	0.9	1	1.6	0.7	0.6	0.6	0.5	1.1	0.8	1.9
Time	1% isoflurane treated
0	2.2	2.1	2	2.4	2	2.2	1.9	1.9	1.9	1.3	1.6	1.9	2.3	1.8	1.9	1.6	2.3
7.5 min	1.1	0.8	2
15 min	0.8	1.2	0.9
30 min	0.7	0.8	0.9	0.7	0.5	0.5	0.5	1.2	0.9	0.7	0.6	0.6	0.7	0.7	0.6	0.9	1.2	0.4	0.7	0.7	0.6
Time	1% isoflurane treated
0	2.2	2.1	2	2.4	2	2.2	1.9	1.9	1.9	1.3	1.6	1.9	2.3	1.8	1.9	1.6	2.3
7.5 min	0.8	1.4	0.8	0.5
15 min	1.4	0.8	0.7
30 min	1.2	1.1	1	1.1	1	0.7	0.8
Panel C - Glucose as a function of time and dose in isoflurane
	Control treated
0	201	142	180	145	159	175	182	126	173	128	163	167	134	148
15 min	170	130	120	140	135	124	132
30 min	182	151	134	109	146	110	99	101	124	117	118	114	138	148	139	130	192	146	155	119	101	140	127	115
	1.5% isoflurane treated
0	201	142	180	145	159	175	182	126	173	128	163	167	134	148
7.5 min	184	166
15 min	194	196	177	195	166
30 min	222	195	147	196	149	132	88	149	153	125	156	130	131	141
	1% isoflurane treated
0	201	142	180	145	159	175	182	126	173	128	163	167	134	148
7.5 min	173	176	146
15 min	158	146	138
30 min	150	179	135	147	179	122	190	141	113	123	120	111	137	96	121	101	124	119	102	105
	0.2% isoflurane treated
0	201	142	180	145	159	175	182	126	173	128	163	167	134	148
7.5 min	130	117	129	129
15 min	134	124	138
30 min	117	107	110
Panel D - Impact of alternative volatile anesthetics on blood BHB
Time	Control treated
0	2.2	2.1	2	2.4	2	2.2	1.9	1.9	1.9	1.3	1.6	1.9	2.3	1.8	1.9	1.6	2.3
15 min	1.7	1.8	0.9	1.9	2	2.2
30 min	2.6	2.4	2	2.2	1.4	1.4	1.4	1.4	1.2	1.8	1.2	1.2	1.5	1.6	1.1	1.6	2.2	2.3	1.6	1.4	1.4	1.8	1.6	1.8	1.6	1.7
Time	1% isoflurane treated
0	2.2	2.1	2	2.4	2	2.2	1.9	1.9	1.9	1.3	1.6	1.9	2.3	1.8	1.9	1.6	2.3
7.5 min	1.1	0.8	2
15 min	0.8	1.2	0.9
30 min	0.7	0.8	0.9	0.7	0.5	0.5	0.5	1.2	0.9	0.7	0.6	0.6	0.7	0.7	0.6	0.9	1.2	0.4	0.7	0.7	0.6
Time	1% halothane treated
0	2.2	2.1	2	2.4	2	2.2	1.9	1.9	1.9	1.3	1.6	1.9	2.3	1.8	1.9	1.6	2.3
7.5 min	1.6	1.8	1.2
15 min	1.4	1.1	0.7
30 min	0.5	0.7	0.7	0.7
Time	2% sevoflurane treated
0	2.2	2.1	2	2.4	2	2.2	1.9	1.9	1.9	1.3	1.6	1.9	2.3	1.8	1.9	1.6	2.3
7.5 min	0.9	1.2	0.9
15 min	0.6	0.6	0.5
30 min	0.3	0.4	0.7

## Sheet: Figure 4
Panel A - Liver BHB
P7 30 min Fasted	P7 30 min 1% Iso	P7 30 min 0.2% Iso
490.44	195.29	235.56
284.45	208.48	194.15
348.07	138.16	179.5
266.5		192.1
Panel B - Plasma free fatty acids
30 min (-) Iso	30 min 1% Iso
45.6836	40.3152
41.2099	47.4731
49.2626	53.7363
49.2626	142.316
97.5786	17.052
168.263	68.0521
	86.8417
Panel C - Liver free fatty acids
30 min (-) Iso	30 min 1% Iso
286.576	402.892
206.05	353.682
398.419	264.208
308.945	389.471
291.05	478.945
183.681	340.261
	277.629
Panel D - Heat map data for plasma acylcarnitines
	30 min Fasted					30 min 1% isoflurane					30 min 1.5% isoflurane
C2	0.732584	0.928746	1.05423	1.18549	1.09896	0.447771	0.444495	0.454578	0.675689	0.546325	0.479972	0.460666	0.575326	0.593893	0.459786
C3	0.760165	1.04638	1.17726	1.31861	0.697586	0.323698	0.52859	0.281449	0.81385	0.390407	0.3777	0.559403	0.373253	0.397713	0.413596
C4/Ci4	0.681335	0.604975	1.18161	1.48036	1.05172	0.386129	0.39164	0.322365	0.51602	0.386129	0.342439	0.334567	0.307014	0.383374	0.388097
C5:1	0.866432	1.26602	1.17713	0.823991	0.866432	0.722293	0.674247	0.788757	0.7287	1.01618	0.711083	0.650224	0.667841	0.545324	0.606983
C5	1.05408	0.942292	1.00316	1.03594	0.964532	0.659019	0.457099	0.676577	0.523821	0.626829	0.618635	0.585274	0.805923	0.711694	0.773148
C4-OH	0.737895	1.06045	1.059	1.27138	0.871267	0.626268	0.50087	0.627718	0.561757	0.365323	0.429835	0.387794	0.606698	0.445781	0.519716
C6	0.799663	0.858586	0.919613	1.38573	1.03641	0	0.160985	0.292508	0	0	0	0	0.207281	0.415614	0.376684
C5-OH/C3-DC	0.959893	0.925134	1.20722	0.955882	0.951872	0.950535	0.862299	0.716578	0.839572	0.729947	0.715241	0.644385	0.612299	0.61631	0.593583
C4-DC/Ci4-DC	1.03306	1.03306	1.00945	0.942542	0.981897	0.669028	0.903188	0.566706	1.03503	0.574577	0.72806	0.765447	0.594254	0.806769	0.761511
C8:1	0.777202	1.08808	0.919689	0.945596	1.26943	0.595855	1.19171	0.699482	0.816062	0.725389	0.816062	0.699482	1.20466	1.5544	0.984456
C8	0.585106	1.39086	1.01064	1.00473	1.00867	0.616627	0	0.71513	1.25493	0.510244	0.610717	0.602837	0.510244	0.504334	0.504334
C5-DC	1.17647	1.1566	1.00954	0.822734	0.834658	0.961844	0	0.671701	2.38474	0.826709	0.782989	0.9062	1.19634	0.814785	1.08903
C8:1-OH/C6:1-DC	0.825499	1.19271	1.23972	0.681551	1.06052	0.599295	1.21034	1.12808	0.652174	1.03408	0.69624	0.843126	1.08402	1.14571	0.358402
C6-DC/C8-OH	1.23726	0.595056	1.33665	0.698267	1.13277	1.09327	0.787462	0.867737	0.681702	0.751784	0.976045	1.41692	0.88685	0.970948	0.769623
C10:3	1.29747	0.601266	2.24684	0.85443	0	1.36076	2.27848	3.03797	0	1.55063	3.25949	2.65823	1.20253	0	0
C10:2	2.73438	0.9375	0	0.9375	0.390625	0	1.25	0.898438	0	1.95312	0	0.742188	0	2.24609	2.42188
C10:1	1.33761	0.513327	1.05133	0.819348	1.27838	0.557749	0.562685	0	0.384995	0.315893	0.656466	0.612043	0.666338	0.454097	0.528134
C10	1.00892	0.990803	0.873746	0.994983	1.13155	0.663322	0.536511	0.62291	0.681438	1.13852	0.67029	0.604794	0.631271	0.636845	0.996377
C7-DC	1.04038	0.86649	0.90333	1.02711	1.16269	1.30563	0.953434	0.90333	1.34247	0.851754	1.00354	0.999116	0.857648	0.783967	0.67934
C8:1-DC	0	1.49807	1.49421	0.918919	1.0888	1	1.19305	0.926641	1.27799	0.84556	1.07336	0.80695	0	1.0888	0.667954
C10-OH/C8-DC	1.06916	1.47645	0	1.18795	1.26644	0	0.673526	0	0.801867	0.694739	0.797624	0.640645	0.582308	0.690496	0.464574
C12:1	0	0	2.28164	1.42602	1.29234	0.641711	0	0	0.508021	0	0.597148	0	0.784314	0.668449	0
C12	0.94109	0.764571	0.959891	1.38082	0.953624	0.495091	0.471067	0.524337	0.733236	0.498224	0.480468	0.524337	0.656988	0.634009	0.736369
C12-OH/C10-DC	0.486726	1.10619	0.737463	1.22419	1.44543	0.545723	0.737463	0.855457	0.707965	0	1.20944	1.10619	1.23894	0.737463	1.43068
C14:2	0.875403	1.0956	0.988185	1.15467	0.886144	0	0.639098	0.38131	0.451128	0.510204	0.359828	0.263158	0.542427	0.440387	0.300752
C14:1	0.80623	1.27806	0.787907	1.14292	0.984883	0.403115	0.597801	0.517636	0.499313	0.42831	0.668804	0.448923	0.687128	0.451214	0.595511
C14	0.677238	1.08477	1.1144	1.15886	0.96473	1.05216	0.849881	0.772822	0.789864	0.62463	0.776526	0.6639	0.992887	0.631298	0.679461
C14:1-OH	1.04032	1.00806	0.935484	0.919355	1.09677	0.806452	0.766129	0.685484	0.475806	0.854839	0.951613	0.604839	0.919355	0.653226	0.395161
C14-OH/C12-DC	0.370763	1.49364	0.688559	1.31356	1.13347	0.550847	1.06992	0.561441	1.04873	0.59322	0.455508	0.635593	0.826271	1.20763	1.00636
C16:2	0.791045	1.19403	0.686567	1.05224	1.27612	0.567164	0.686567	0.522388	0.544776	0.559701	0.880597	0.701493	0.597015	0.604478	0.619403
C16:1	0.770065	1.21746	1.00597	0.986985	1.01952	0.835141	1.0385	0.558568	0.675163	0.629067	0.686009	0.618221	1.05477	0.745662	0.501627
C16	0.721068	1.18621	0.887053	1.12792	1.07774	1.05072	0.980468	0.844978	1.00324	0.837644	0.814483	0.689416	0.893615	0.762372	0.814869
C16:1-OH/C14:1-DC	1.09982	1.21072	0.619224	0.961183	1.10906	0.887246	1.04436	1.14603	1.51571	0.785582	0.868762	0.609982	1.18299	0.859519	1.15527
C16-OH/C14-DC	1.29825	0	0.807018	1.65789	1.23684	1.38596	0	1.26316	1.70175	1.31579	1.20175	1.0614	1.5	1.36842	0.894737
C18:2	0.715997	1.23237	1.03673	0.968858	1.04605	0.700027	0.445834	0.562949	0.769231	0.616183	0.562949	0.617514	0.928933	0.797179	0.73729
C18:1	0.779749	1.19311	0.893006	1.06211	1.07203	0.725992	0.674843	0.641441	0.749478	0.718163	0.629436	0.616388	0.942067	0.820981	0.782881
C18	0.754135	1.26461	0.970232	0.907387	1.10364	0.800441	0.940463	0.974642	1.06836	0.787211	0.777288	0.696803	0.911797	0.851158	0.836825
C18:2-OH	2.0302	0	1.61074	0	1.35906	1.3255	2.31544	1.84564	2.04698	1.02349	0.45302	0	1.6443	1.84564	1.62752
C18:1-OH/C16:1-DC	0.861582	1.08757	0.960452	1.15819	0.932203	0.819209	0.614407	0.741525	0.812147	0.875706	0.480226	1.74435	1.02401	1.1935	0.85452
C18-OH/C16-DC	0.337079	1.22574	1.03166	1.36874	1.03677	0.755873	1.31256	1.21553	0.87334	0.87334	0.893769	0.72523	0.81716	0.980592	1.02656
C20:4	0.672515	1.2924	0.871345	1.03801	1.12573	0.374269	0.438596	0.377193	0.549708	0.333333	0.353801	0.523392	0.584795	0.426901	0.435673
C20	0.788288	0.585586	2.11712	0.518018	0.990991	2.27477	1.23874	1.28378	0.900901	0.968468	2.0045	1.71171	0	1.75676	2.36486
C18:1-DC	0.897727	1.02273	0.943182	1.125	1.01136	0.738636	2.70455	1.22727	0.409091	1.375	1.14773	0.840909	1.09091	0.602273	0.454545
C20-OH/C18-DC	0.974441	2.1246	1.15016	0	0.750799	0.399361	0.990415	0.766773	0.43131	0.527157	0.591054	1.13419	0.591054	0	0.86262
C22	0.4	0.925	1.225	0.475	1.975	1.8	1.35	1.675	1.4	0.9	0.875	1.625	1.75	1.375	2.2
Panel E - Heat map data for liver acylcarnitines
	30 min Fasted					30 min 1% isoflurane					30 min 1.5% isoflurane
C2	0.973746	1.06261	0.897535	0.894668	1.17144	0.775873	0.884981	1.3034	1.11273	1.16185	1.03678	1.19269	1.02811	1.41342	1.21404
C3	1.28404	0.841005	0.795295	0.960875	1.11878	1.03975	0.683097	0.832694	0.924115	1.00563	1.37424	0.97462	0.826621	0.817031	1.01745
C4/Ci4	1.04739	0.829863	0.989701	1.21201	0.921038	1.12075	0.265646	0.353444	0.658487	0.384118	0.986683	0.400439	0.428861	0.49077	0.359072
C5:1	1.0075	1.09244	0.873829	1.05434	0.971893	0.958043	0.531543	0.636477	0.623985	0.819488	0.902995	0.906933	0.72767	0.989382	0.810743
C5	1.12295	0.724118	1.12389	1.12295	0.906091	0.894716	0.373374	0.364888	0.82689	0.368659	1.24875	0.351688	0.378088	0.426174	0.254573
C4-OH	0.731918	1.30848	0.935612	1.11082	0.913171	1.38986	0.460038	0.668911	0.606767	0.575695	0.913978	0.779389	1.08061	0.789746	0.761264
C6	0.802928	0.706795	0.968975	1.53922	0.982084	1.04079	0.352851	0.315709	0.525453	0.459908	0.707837	0.456631	0.693686	0.675115	0.771248
C5-OH/C3-DC	1.09627	1.02067	0.94506	0.977823	0.960181	0.866142	0.917339	1.28528	1.20968	1.08619	1.18093	1.17692	0.975302	1.12651	1.04083
C4-DC/Ci4-DC	0.752896	1.12184	0.960961	0.918061	1.24625	0.698854	0.602746	1.13685	1.24625	1.19906	0.881057	0.709996	1.17975	1.11326	0.607036
C8:1	0.906736	1.03627	1.11399	1.1399	0.803109	1.37184	0.405872	0.466321	0.345423	0.518135	0.761246	0.215889	0.846287	0.621762	0.431779
C8	0.822858	1.20422	0.899286	1.0405	1.03313	1.04253	0.691341	0.993948	0.917132	0.790658	0.980934	0.649053	1.14098	1.01218	0.697936
C5-DC	0.988635	1.09823	0.994433	0.991534	0.927172	1.11201	0.705671	0.942827	0.866288	0.814102	1.08126	0.852951	0.986896	0.889482	0.704511
C8:1-OH/C6:1-DC	0.883006	1.39115	0.847834	0.819141	1.05887	0.801461	0.693262	1.04776	0.982044	0.894113	1.05947	0.895039	1.18567	0.914476	0.598852
C6-DC/C8-OH	0.829983	1.07802	1.06476	0.958475	1.06876	1.14598	0.452297	0.757687	0.710016	0.649401	0.936449	0.509229	0.997516	0.703071	0.56111
C10:3	0.689655	0.837438	1.35468	1.35468	0.763547	1.8	0.246305	0	0.172414	0.369458	1.14754	0.492611	0.615764	1.03448	0.172414
C10:2	1.37324	0.915493	1.02113	0.457746	1.23239	1.90476	0.387324	0.352113	0	0.633803	0	0	0.669014	0.669014	0
C10:1	0.985151	0.702456	1.03084	1.00228	1.27927	1.22674	0.274129	0.376927	0.55968	0.64249	0.909548	0.376927	0.468304	0.573958	0.905197
C10	0.759698	0.802353	0.982399	1.1941	1.26145	0.972069	0.4463	0.518364	0.584591	0.580999	0.732212	0.521282	0.845681	0.813578	0.919316
C7-DC	1.00775	1.25132	0.900669	0.773307	1.06695	0.929702	0.92753	0.958046	1.2071	0.853708	1.00266	0.744619	1.11757	0.828856	0.600263
C8:1-DC	0.850918	1.57851	0.781721	0.789942	0.998904	0.777107	0.877638	0.813237	0.678268	0.795423	0.909163	0.719375	1.2613	0.926966	0.646753
C10-OH/C8-DC	0.838391	1.20166	0.938963	1.0274	0.993584	0.961538	0.573955	0.5176	0.565285	0.49159	0.827635	0.530605	0.863534	0.625108	0.520201
C12:2	0.729927	0.851582	1.08273	1.20438	1.13139	1.22642	0.40146	0.510949	0.693431	0.340633	0.958466	1.04623	0.924574	0.6691	0.437956
C12:1	0.825103	0.847737	0.979424	1.11934	1.2284	1.1424	0.411523	0.504115	0.539095	0.518519	0.859181	0.40535	0.969136	0.744856	0.627572
C12	0.64312	0.527665	1.35866	1.52952	0.941035	1.59361	0.282581	0.283612	0.624565	0.419426	0.557242	0.468392	1.05185	0.887947	0.911141
C12:2-OH/C10:2-DC	1.01946	0.875635	0.947547	1.07868	1.07868	0.967302	0.389171	0.317259	0.304569	0.241117	1.08744	0.287648	0.617597	0.300338	0.270728
C12:1-OH/C10:1-DC	0.938402	0.717036	1.19827	0.976901	1.16939	0.924171	0.293551	0.490857	0.500481	0.370549	1.28065	0.341675	0.644851	0.327238	0
C12-OH/C10-DC	0.744681	1.10372	0.970745	1.17021	1.01064	0.83004	0.585106	0.904255	0.731383	0.585106	0.810127	0.718085	1.35638	1.17021	1.15691
C14:3	0.983607	1.36612	1.06557	0.79235	0.79235	1.61157	0.655738	0.546448	0.382514	0.655738	0.866667	0.928962	0.983607	0.655738	0.819672
C14:2	0.894495	1.09518	1.02638	1.06651	0.917431	0.909091	0.430046	0.561927	0.728211	0.65367	0.815603	0.905963	1.34748	0.87156	0.934633
C14:1	0.72621	0.878548	1.08723	1.15401	1.15401	1.06656	0.634391	0.671953	1.01836	0.684474	0.749386	0.928631	1.79257	1.13105	1.202
C14	0.629398	0.656181	1.51271	1.37407	0.827644	1.64813	0.464762	0.473952	0.931625	0.613906	0.571687	0.598414	1.4896	0.914032	1.11464
C14:3-OH/C12:3-DC	0	1.32653	0	1.42857	2.2449	0	1.32653	1.83673	0.918367	0.714286	1.875	0.612245	0.918367	0.714286	1.83673
C14:2-OH/C12:2-DC	0.921875	1.09375	0.9375	1.15625	0.890625	1.03604	0.5	0.71875	0.84375	0.6875	0.804416	0.75	1.23438	0.90625	1.26562
C14:1-OH/C12:1-DC	0.83926	0.860597	1.24467	1.23044	0.825036	1.26157	0.348506	0.618777	0.697013	0.633001	0.600624	1.03841	1.08108	0.960171	0.931721
C14-OH/C12-DC	0.603175	1.11111	1.12698	1.31746	0.84127	1.11111	0.650794	1.11111	0.952381	0.507937	0.501139	1.01587	2.33333	1.38095	1.53968
C16:3	0.767494	1.17381	0.959368	0.767494	1.33183	1.03687	0.383747	0.462754	0.428894	0.665914	0.761905	0.665914	0.790068	0.756208	0.801354
C16:2	0.775302	1.13278	1.09099	0.86351	1.13742	1.1647	0.752089	0.923863	1.11885	1.11885	0.792575	1.13278	2.49304	1.40669	1.59703
C16:1	0.762454	0.860344	1.36502	1.12682	0.88536	1.48736	0.612356	0.685229	1.07461	0.923428	0.725366	0.86687	1.91647	1.12465	1.3672
C16	0.683667	0.750014	1.44277	1.27978	0.843766	1.75368	0.426354	0.393758	0.82141	0.652513	0.673138	0.448278	1.09776	0.625108	0.792852
C16:3-OH/C14:3-DC	0.8	0.7	0.7	2.8	0	0.681818	0	0	0.8	1.1	1.09091	1.3	0.8	0.9	1.3
C16:2-OH/C14:2-DC	0.693717	0.942408	1.23037	1.24346	0.890052	1.23636	0.706806	0.562827	0.575916	0.863874	0.689655	0.549738	1.21728	0.890052	0.942408
C16:1-OH/C14:1-DC	0.816327	0.789116	1.31973	1.2517	0.823129	1.23827	0.517007	0.598639	0.904762	0.707483	0.757801	0.605442	1.4898	0.918367	0.870748
C16-OH/C14-DC	0.719178	1.18151	0.967466	1.25	0.881849	1.23563	0.736301	0.753425	0.950342	0.924658	0.584795	0.770548	2.5	1.66096	1.53253
C18:3	0.752475	1.15842	1.15842	0.787129	1.14356	1.39464	0.509901	0.60396	1.03465	0.782178	0.587571	0.608911	1.40594	0.871287	0.980198
C18:2	0.742885	0.961409	1.3015	0.900145	1.09407	1.41478	0.452967	0.448625	0.978775	0.78823	0.756049	0.700434	1.30246	0.751568	0.985046
C18:1	0.784957	0.830101	1.39655	1.11813	0.870267	1.57695	0.404923	0.376772	0.800405	0.570394	0.715155	0.553744	1.16842	0.694154	0.846922
C18	0.877992	0.873912	1.16499	1.2398	0.843308	1.32439	0.359766	0.440696	0.769178	0.555631	0.869077	0.438656	0.7787	0.476741	0.559032
C18:3-OH/C16:3-DC	1.68317	0.841584	0.792079	0.643564	1.0396	0.506329	0.990099	0.544554	1.0396	0.940594	0.630631	0.544554	2.47525	0.742574	1.0396
C18:2-OH/C16:2-DC	0.789474	0.949657	0.995423	1.27002	0.995423	1.19469	0.709382	0.697941	0.892449	0.652174	0.680346	0.823799	1.47597	1.21281	1.06407
C18:1-OH/C16:1-DC	0.617284	1.11111	1.0582	1.08466	1.12875	1.14286	0.582011	0.828924	0.828924	0.617284	0.759036	0.881834	2.71605	1.3933	1.21693
C18-OH/C16-DC	0.87269	0.852156	1.12936	1.22177	0.924025	1.20112	0.50308	0.677618	0.965092	0.646817	0.875706	0.544148	0.780287	0.903491	0.770021
C20:4	1.0614	1.12089	0.92099	0.850785	1.04593	1.04704	0.335554	0.39981	0.624703	0.499762	1.11568	0.415278	0.594955	0.331985	0.343884
C20:3	1.09346	0.920561	1.07944	1.01168	0.89486	1.16898	0.219626	0.338785	0.570093	0.418224	0.873405	0.411215	0.728972	0.413551	0.411215
C20:2	0.934353	0.79448	1.29056	1.20477	0.77583	1.29834	0.274151	0.333831	0.635957	0.505408	0.837046	0.443864	0.956733	0.484894	0.553898
C20:1	0.923836	0.749882	1.21298	1.42924	0.684062	1.26214	0.272685	0.307945	0.575929	0.472496	0.85924	0.425482	0.808651	0.470146	0.550071
C20	0.760369	0.668203	1.2212	1.72811	0.62212	1.21324	0.437788	0.483871	0.62212	0.829493	0.868056	0.506912	0.552995	1.08295	0.599078
C20:3-OH/C18:3-DC	0.913043	1.21739	0.695652	0.434783	1.73913	1.66667	0	0.695652	0.26087	0.26087	0.792683	0.695652	0.652174	1.04348	0.608696
C20:2-OH/C18:2-DC	0.789474	1.03239	0.951417	1.25506	0.97166	1.38728	0.607287	0.789474	0.48583	0.647773	0.963303	0.789474	1.01215	0.931174	0.82996
C20:1-OH/C18:1-DC	0.533708	1.23596	0.926966	1.3764	0.926966	0.952381	0.646067	0.337079	1.01124	0.393258	1.12903	0.758427	0.955056	0.786517	0.870787
C20-OH/C18-DC/C22:6	1.01211	1.20242	0.787197	0.683391	1.31488	1.35171	0.717993	0.380623	0.66609	0.640138	0.839041	0.588235	0.778547	0.320069	0.415225
C22:5	1.21662	1.42433	0.637982	0.816024	0.905045	1.35135	0.489614	0.237389	0.623145	0.252226	1.07143	0.593472	0.697329	0.326409	0.178042
C22:4	1.14551	1.20743	1.03715	0.990712	0.619195	1.59091	0	0.371517	0.743034	0.278638	0.826087	0.325077	0.588235	0.232198	0.340557
C22:3	1.63793	0	0.948276	1.46552	0.948276	3.51852	0	0	0.689655	0	0	0.431034	0	0	0
C22:2	0	0	2.14286	2.85714	0	0	0	0	0	1.66667	0	0	0	0	1.19048
Panel F - all plasma raw acylcarnitine data provided below
	30 min no treatment					30 min 1% isoflurane					30 min 1.5% isoflurane
C2	11.7512	14.8978	16.9106	19.0161	17.6281	7.18258	7.13003	7.29178	10.8386	8.76347	7.69911	7.38944	9.22867	9.5265	7.37531
C3	0.345024	0.47493	0.534333	0.598493	0.31662	0.14692	0.239916	0.127744	0.36939	0.177198	0.171431	0.253902	0.169412	0.180514	0.187723
C4/Ci4	0.288533	0.256196	0.50039	0.626905	0.445384	0.163519	0.165852	0.136516	0.218525	0.163519	0.145016	0.141683	0.130015	0.162352	0.164352
C5:1	0.232163	0.339233	0.315416	0.220791	0.232163	0.193541	0.180667	0.21135	0.195257	0.272288	0.190537	0.17423	0.17895	0.146121	0.162643
C5	0.386438	0.345455	0.367771	0.379786	0.353609	0.241604	0.167578	0.248041	0.192039	0.229803	0.226799	0.214569	0.295461	0.260915	0.283445
C4-OH	0.218431	0.313914	0.313485	0.376353	0.257911	0.185387	0.148267	0.185816	0.166291	0.108143	0.127239	0.114794	0.179594	0.13196	0.153846
C6	0.139755	0.150053	0.160719	0.242181	0.18113	0	0.028135	0.051121	0	0	0	0	0.036226	0.072636	0.0658321
C5-OH/C3-DC	0.132032	0.127251	0.166051	0.13148	0.130929	0.130745	0.118608	0.0985643	0.115482	0.100403	0.0983804	0.0886343	0.084221	0.0847726	0.0816465
C4-DC/Ci4-DC	0.0773954	0.0773954	0.0756264	0.0706141	0.0735625	0.0501228	0.0676657	0.0424569	0.0775429	0.0430466	0.0545454	0.0573463	0.0445208	0.0604422	0.0570515
C8:1	0.00884519	0.0123833	0.0104668	0.0107617	0.0144472	0.00678132	0.0135626	0.00796067	0.00928745	0.00825551	0.00928745	0.00796067	0.01371	0.0176904	0.0112039
C8	0.0437837	0.104078	0.0756264	0.0751841	0.075479	0.0461424	0	0.0535134	0.0939065	0.0381818	0.0457002	0.0451105	0.0381818	0.0377395	0.0377395
C5-DC	0.0436363	0.0428992	0.0374447	0.0305159	0.0309582	0.0356756	0	0.024914	0.0884519	0.0306633	0.0290417	0.0336117	0.0443734	0.0302211	0.0403931
C8:1-OH/C6:1-DC	0.0379306	0.0548037	0.0569634	0.0313164	0.0487294	0.0275368	0.0556136	0.051834	0.0299665	0.0475145	0.0319913	0.0387405	0.0498092	0.0526439	0.0164681
C6-DC/C8-OH	0.13107	0.0630377	0.141599	0.0739714	0.120001	0.115817	0.0834203	0.0919244	0.0722166	0.0796408	0.103398	0.150103	0.0939491	0.102858	0.0815306
C10:3	0.00553436	0.0025647	0.00958389	0.00364458	0	0.00580433	0.00971888	0.0129585	0	0.00661423	0.0139034	0.0113387	0.00512941	0	0
C10:2	0.0188978	0.00647925	0	0.00647925	0.00269969	0	0.008639	0.00620928	0	0.0134984	0	0.00512941	0	0.0155232	0.0167381
C10:1	0.0365808	0.0140384	0.0287517	0.0224074	0.034961	0.0152532	0.0153882	0	0.0105288	0.008639	0.0179529	0.0167381	0.0182229	0.0124186	0.0144433
C10	0.0977287	0.0959739	0.0846352	0.0963788	0.109607	0.0642526	0.051969	0.060338	0.0660074	0.110282	0.0649275	0.0585832	0.0611479	0.0616879	0.0965138
C7-DC	0.095299	0.0793708	0.0827454	0.0940841	0.106503	0.119596	0.0873349	0.0827454	0.122971	0.078021	0.0919244	0.0915194	0.0785609	0.0718117	0.0622278
C8:1-DC	0	0.0436821	0.0435696	0.0267947	0.0317484	0.029159	0.0347881	0.0270199	0.0372649	0.0246556	0.031298	0.0235298	0	0.0317484	0.0194768
C10-OH/C8-DC	0.113484	0.156715	0	0.126093	0.134424	0	0.0714901	0	0.0851126	0.0737418	0.0846623	0.068	0.061808	0.0732914	0.0493113
C12:1	0	0	0.0288212	0.0180133	0.0163245	0.00810596	0	0	0.00641722	0	0.00754305	0	0.00990729	0.00844371	0
C12	0.101437	0.0824106	0.103464	0.148835	0.102788	0.0533643	0.0507749	0.0565166	0.0790332	0.053702	0.0517881	0.0565166	0.0708146	0.0683378	0.0793709
C12-OH/C10-DC	0.00490331	0.0111439	0.00742926	0.0123326	0.0145613	0.00549765	0.00742926	0.00861794	0.00713208	0	0.012184	0.0111439	0.0124811	0.00742926	0.0144128
C14:2	0.0242194	0.0303114	0.0273397	0.0319458	0.0245165	0	0.0176816	0.0105495	0.0124811	0.0141156	0.0099552	0.00728067	0.0150071	0.012184	0.00832077
C14:1	0.052302	0.0829105	0.0511133	0.074144	0.0638916	0.026151	0.0387807	0.0335802	0.0323916	0.0277854	0.0433869	0.0291227	0.0445755	0.0292713	0.0386321
C14	0.135807	0.217529	0.223472	0.232387	0.193458	0.210991	0.170427	0.154974	0.158392	0.125257	0.155717	0.133132	0.199104	0.126595	0.136253
C14:1-OH	0.0191675	0.0185731	0.0172359	0.0169387	0.0202076	0.0148585	0.0141156	0.0126297	0.00876652	0.01575	0.017533	0.0111439	0.0169387	0.0120354	0.00728067
C14-OH/C12-DC	0.00520048	0.0209505	0.00965803	0.0184246	0.0158986	0.00772643	0.0150071	0.00787501	0.0147099	0.00832077	0.00638916	0.00891511	0.0115896	0.0169387	0.0141156
C16:2	0.0125889	0.0190022	0.0109263	0.0167457	0.0203086	0.00902604	0.0109263	0.00831346	0.00866975	0.00890727	0.0140141	0.0111638	0.00950109	0.00961986	0.00985738
C16:1	0.0337289	0.0533249	0.0440613	0.04323	0.0446551	0.0365792	0.0454865	0.0244653	0.0295721	0.0275532	0.0300472	0.0270781	0.0461991	0.03266	0.0219713
C16	0.22185	0.364961	0.272919	0.347027	0.331588	0.323275	0.30166	0.259974	0.308667	0.257717	0.250591	0.212112	0.274938	0.234558	0.25071
C16:1-OH/C14:1-DC	0.0141329	0.015558	0.00795716	0.0123514	0.0142516	0.0114013	0.0134203	0.0147267	0.0194772	0.0100949	0.0111638	0.0078384	0.0152017	0.011045	0.0148455
C16-OH/C14-DC	0.017577	0	0.0109263	0.0224463	0.0167457	0.0187647	0	0.017102	0.0230401	0.0178145	0.0162706	0.0143704	0.0203086	0.0185271	0.0121139
C18:2	0.0522349	0.0899062	0.0756339	0.0706822	0.0763135	0.0510698	0.0325255	0.0410695	0.0561186	0.0449531	0.0410695	0.0450502	0.0677695	0.0581575	0.0537884
C18:1	0.145054	0.22195	0.166123	0.19758	0.199425	0.135054	0.125539	0.119325	0.139423	0.133597	0.117092	0.114664	0.175249	0.152724	0.145636
C18	0.0664102	0.111363	0.0854401	0.0799059	0.0971881	0.070488	0.0828186	0.0858284	0.0940812	0.069323	0.0684491	0.0613615	0.0802942	0.0749542	0.073692
C18:2-OH	0.011748	0	0.00932073	0	0.00786437	0.00767019	0.0133986	0.01068	0.0118451	0.00592255	0.00262146	0	0.00951492	0.01068	0.00941782
C18:1-OH/C16:1-DC	0.0118451	0.014952	0.0132044	0.0159229	0.012816	0.0112626	0.00844691	0.0101946	0.0111655	0.0120393	0.00660219	0.0239815	0.0140782	0.0164084	0.011748
C18-OH/C16-DC	0.006408	0.0233018	0.0196124	0.0260204	0.0197095	0.0143695	0.0249524	0.0231077	0.0166026	0.0166026	0.0169909	0.0137869	0.0155346	0.0186415	0.0195153
C20:4	0.0223309	0.0429142	0.0289331	0.0344673	0.03738	0.0124276	0.0145636	0.0125247	0.0182531	0.0110684	0.011748	0.0173793	0.0194182	0.0141753	0.0144666
C20	0.00339818	0.00252437	0.00912655	0.00223309	0.004272	0.00980619	0.00534	0.00553418	0.00388364	0.00417491	0.0086411	0.00737891	0	0.0075731	0.0101946
C18:1-DC	0.00767019	0.00873819	0.00805855	0.00961201	0.0086411	0.00631091	0.0231077	0.0104858	0.00349527	0.011748	0.00980619	0.00718473	0.00932073	0.00514582	0.00388364
C20-OH/C18-DC	0.00592255	0.0129131	0.00699055	0	0.00456328	0.00242727	0.00601964	0.00466037	0.00262146	0.003204	0.00359237	0.00689346	0.00359237	0	0.00524291
C22	0.00155346	0.00359237	0.00475746	0.00184473	0.00767019	0.00699055	0.00524291	0.00650509	0.00543709	0.00349527	0.00339818	0.00631091	0.00679637	0.00534	0.00854401
Panel G - all raw liver acylcarnitine data provided below
	30 min no treatment					30 min 1% isoflurane					30 min 1.5% isoflurane
C2	4.98715	5.44227	4.59682	4.58214	5.99966	4.1984	4.53253	6.67552	5.69895	5.95056	6.4958	6.10851	5.26559	7.23898	6.21786
C3	0.386115	0.252893	0.239147	0.288938	0.336421	0.27202	0.205409	0.250393	0.277884	0.302394	0.414375	0.293071	0.248567	0.245683	0.305951
C4/Ci4	0.413603	0.327704	0.390822	0.47861	0.363708	0.189577	0.104901	0.139571	0.26003	0.151684	0.163019	0.158129	0.169353	0.1938	0.141794
C5:1	0.230733	0.250187	0.200121	0.241461	0.222579	0.141758	0.121732	0.145764	0.142903	0.187676	0.173371	0.207702	0.166648	0.226584	0.185673
C5	0.170367	0.109859	0.17051	0.170367	0.137467	0.0639414	0.0566461	0.0553587	0.125451	0.0559309	0.0712368	0.0533561	0.0573613	0.0646567	0.0386223
C4-OH	0.121303	0.216857	0.155062	0.1841	0.151342	0.14748	0.0762434	0.11086	0.100561	0.0954115	0.126452	0.12917	0.179093	0.130887	0.126166
C6	0.0901054	0.0793173	0.108739	0.172733	0.110211	0.0487918	0.0395973	0.0354292	0.0589669	0.0516114	0.0480562	0.0512436	0.0778462	0.0757621	0.0865502
C5-OH/C3-DC	0.0533277	0.0496499	0.0459721	0.0475658	0.0467077	0.0458496	0.0446236	0.0625221	0.0588443	0.0528373	0.064974	0.0572506	0.0474433	0.0547988	0.0506307
C4-DC/Ci4-DC	0.0344963	0.0514004	0.0440294	0.0420638	0.0571006	0.0311547	0.0276167	0.0520884	0.0571006	0.0549385	0.0353808	0.0325307	0.054054	0.0510073	0.0278132
C8:1	0.0103194	0.0117936	0.0126781	0.012973	0.00914003	0.00746928	0.00461916	0.00530712	0.0039312	0.0058968	0.00432432	0.002457	0.00963143	0.00707615	0.004914
C8	0.208452	0.305061	0.227813	0.263587	0.261719	0.226437	0.175135	0.251793	0.232334	0.200294	0.216412	0.164422	0.289041	0.256412	0.176806
C5-DC	0.167567	0.186142	0.16855	0.168059	0.15715	0.161376	0.119607	0.159803	0.14683	0.137985	0.160589	0.14457	0.167272	0.150761	0.11941
C8:1-OH/C6:1-DC	0.0858501	0.135254	0.0824305	0.0796408	0.102948	0.0671322	0.0674022	0.101868	0.095479	0.0869299	0.0939491	0.0870199	0.115277	0.0889097	0.0582233
C6-DC/C8-OH	0.709748	0.921853	0.910515	0.819625	0.913934	0.653324	0.386775	0.647925	0.60716	0.555326	0.546057	0.43546	0.853011	0.60122	0.479824
C10:3	0.00251971	0.00305965	0.00494943	0.00494943	0.00278968	0.00161981	0.000899896	0	0.000629927	0.00134984	0.00251971	0.00179979	0.00224974	0.00377956	0.000629927
C10:2	0.00350959	0.00233973	0.0026097	0.00116986	0.00314964	0.00215975	0.000989885	0.000899896	0	0.00161981	0	0	0.0017098	0.0017098	0
C10:1	0.0310464	0.0221374	0.0324862	0.0315863	0.0403153	0.0189878	0.008639	0.0118786	0.017638	0.0202477	0.0162881	0.0118786	0.0147583	0.0180879	0.0285267
C10	0.304525	0.321623	0.393794	0.478655	0.505651	0.206076	0.178899	0.207786	0.234333	0.232893	0.213185	0.208956	0.338991	0.326122	0.368507
C7-DC	0.496293	0.616249	0.443559	0.380836	0.525449	0.443919	0.456787	0.471815	0.594471	0.420431	0.406573	0.366708	0.550376	0.408193	0.295616
C8:1-DC	0.0932186	0.172927	0.085638	0.0865387	0.109431	0.0637969	0.0961457	0.0890906	0.0743047	0.0871391	0.0865387	0.078808	0.138177	0.10155	0.0708521
C10-OH/C8-DC	0.0725784	0.104027	0.0812848	0.0889404	0.0860133	0.0442826	0.0496866	0.044808	0.048936	0.0425563	0.0436071	0.0459338	0.074755	0.0541148	0.0450331
C12:2	0.00450331	0.00525387	0.00667991	0.00743047	0.00698014	0.00390287	0.00247682	0.00315232	0.00427815	0.00210155	0.00450331	0.00645475	0.0057042	0.00412804	0.00270199
C12:1	0.0300971	0.0309228	0.0357263	0.04083	0.044808	0.0213157	0.015011	0.0183885	0.0196645	0.0189139	0.0207903	0.0147859	0.035351	0.02717	0.0228918
C12	0.374601	0.307351	0.791382	0.890906	0.548128	0.438773	0.164596	0.165197	0.363793	0.244305	0.242503	0.272826	0.612676	0.517206	0.530716
C12:2-OH/C10:2-DC	0.0477454	0.0410095	0.0443774	0.050519	0.050519	0.0140661	0.0182264	0.0148585	0.0142642	0.0112925	0.019217	0.0134717	0.0289246	0.0140661	0.0126793
C12:1-OH/C10:1-DC	0.0386321	0.0295189	0.0493303	0.0402171	0.0481416	0.0154529	0.0120849	0.0202076	0.0206038	0.0152547	0.0186227	0.0140661	0.0265472	0.0134717	0
C12-OH/C10-DC	0.0110944	0.0164434	0.0144623	0.017434	0.0150566	0.00832077	0.008717	0.0134717	0.0108962	0.008717	0.0126793	0.0106981	0.0202076	0.017434	0.0172359
C14:3	0.00713209	0.00990568	0.00772643	0.00574529	0.00574529	0.00772643	0.00475473	0.00396227	0.00277359	0.00475473	0.00515095	0.00673586	0.00713209	0.00475473	0.00594341
C14:2	0.0309057	0.0378397	0.0354623	0.0368491	0.0316982	0.0182264	0.0148585	0.0194151	0.0251604	0.0225849	0.0273397	0.0313019	0.0465567	0.0301133	0.0322925
C14:1	0.0689435	0.0834058	0.103217	0.109557	0.109557	0.0774624	0.0602265	0.0637926	0.0966794	0.0649813	0.0845945	0.0881605	0.17018	0.107378	0.114113
C14	0.474878	0.495086	1.14133	1.03673	0.624454	0.921624	0.350661	0.357595	0.702907	0.46319	0.400982	0.451501	1.1239	0.689633	0.840992
C14:3-OH/C12:3-DC	0	0.00257548	0	0.00277359	0.0043585	0	0.00257548	0.00356604	0.00178302	0.00138679	0.00475473	0.00118868	0.00178302	0.00138679	0.00356604
C14:2-OH/C12:2-DC	0.0116887	0.013868	0.0118868	0.0146604	0.0112925	0.00911322	0.00633963	0.00911322	0.0106981	0.008717	0.0101038	0.00950945	0.015651	0.0114906	0.0160472
C14:1-OH/C12:1-DC	0.0233774	0.0239717	0.0346699	0.0342736	0.0229812	0.0215944	0.00970756	0.0172359	0.0194151	0.0176321	0.0152547	0.0289246	0.0301133	0.0267453	0.0259529
C14-OH/C12-DC	0.00752832	0.013868	0.0140661	0.0164434	0.0105	0.0114906	0.00812266	0.013868	0.0118868	0.00633963	0.008717	0.0126793	0.0291227	0.0172359	0.019217
C16:3	0.010768	0.0164686	0.0134599	0.010768	0.0186856	0.00712586	0.00538398	0.00649245	0.00601739	0.00934279	0.00760091	0.00934279	0.0110847	0.0106096	0.011243
C16:2	0.0264448	0.038638	0.0372128	0.0294535	0.0387963	0.0405382	0.0256531	0.0315121	0.0381629	0.0381629	0.0425968	0.038638	0.0850352	0.0479808	0.0544732
C16:1	0.111005	0.125257	0.198732	0.164053	0.128899	0.203166	0.0891524	0.099762	0.156452	0.134441	0.130324	0.126207	0.279017	0.163736	0.199049
C16	0.75059	0.823432	1.584	1.40506	0.926361	1.36056	0.468089	0.432302	0.901816	0.716386	0.506252	0.492159	1.20522	0.686299	0.870463
C16:3-OH/C14:3-DC	0.00126682	0.00110847	0.00110847	0.00443387	0	0.000475057	0	0	0.00126682	0.00174188	0.00190023	0.00205858	0.00126682	0.00142517	0.00205858
C16:2-OH/C14:2-DC	0.00839267	0.0114014	0.0148851	0.0150435	0.010768	0.010768	0.00855103	0.00680915	0.0069675	0.0104513	0.0069675	0.0066508	0.0147268	0.010768	0.0114014
C16:1-OH/C14:1-DC	0.0190023	0.0183689	0.0307204	0.0291368	0.0191606	0.0209025	0.0120348	0.013935	0.0210609	0.0164686	0.0161519	0.0140934	0.0346792	0.0213776	0.0202691
C16-OH/C14-DC	0.0133016	0.0218526	0.0178938	0.0231194	0.0163103	0.0204274	0.0136183	0.013935	0.0175771	0.0171021	0.0158352	0.0142517	0.0462389	0.0307204	0.0283451
C18:3	0.019677	0.0302922	0.0302922	0.0205831	0.0299038	0.0296449	0.0133337	0.0157934	0.0270558	0.0204537	0.0134632	0.0159228	0.0367649	0.0227839	0.0256318
C18:2	0.199359	0.258001	0.349266	0.241561	0.293601	0.282597	0.121557	0.120392	0.262662	0.211527	0.178776	0.187967	0.349525	0.201689	0.264344
C18:1	0.591992	0.626038	1.05324	0.843261	0.65633	0.747854	0.305381	0.284151	0.603643	0.430175	0.410757	0.417618	0.881191	0.523511	0.638725
C18	0.167125	0.166348	0.221754	0.235994	0.160523	0.145765	0.068481	0.083886	0.146412	0.105764	0.0902292	0.0834976	0.148224	0.090747	0.106411
C18:3-OH/C16:3-DC	0.00440143	0.00220071	0.00207126	0.0016829	0.00271853	0.00103563	0.00258907	0.00142399	0.00271853	0.00245962	0.00181235	0.00142399	0.00647268	0.00194181	0.00271853
C18:2-OH/C16:2-DC	0.00893231	0.0107447	0.0112625	0.0143694	0.0112625	0.0104858	0.00802613	0.00789668	0.0100974	0.00737886	0.00815558	0.00932067	0.0166995	0.0137221	0.0120392
C18:1-OH/C16:1-DC	0.00906176	0.0163112	0.0155344	0.0159228	0.0165701	0.0124276	0.00854395	0.0121686	0.0121686	0.00906176	0.0163112	0.0129454	0.0398717	0.0204537	0.0178646
C18-OH/C16-DC	0.0110036	0.0107447	0.0142399	0.015405	0.0116508	0.011133	0.00634323	0.00854395	0.0121686	0.00815558	0.00802613	0.00686105	0.00983848	0.0113919	0.00970903
C20:4	0.115473	0.121945	0.100197	0.0925594	0.11379	0.0535938	0.0365059	0.0434964	0.0679632	0.0543706	0.0526877	0.0451793	0.0647269	0.0361176	0.0374121
C20:3	0.0605843	0.0510048	0.0598076	0.0560535	0.0495808	0.0261496	0.0121686	0.0187708	0.0315867	0.0231722	0.0230428	0.0227839	0.0403896	0.0229133	0.0227839
C20:2	0.0648563	0.0551473	0.089582	0.0836271	0.0538527	0.0425903	0.0190297	0.0231722	0.0441437	0.035082	0.0340463	0.03081	0.0664098	0.033658	0.0384478
C20:1	0.0508753	0.0412957	0.0667981	0.0787079	0.037671	0.0302922	0.0150166	0.0169584	0.0317162	0.0260202	0.0257613	0.0234311	0.0445321	0.0258907	0.0302922
C20	0.00427197	0.00375416	0.00686105	0.00970903	0.00349525	0.00427197	0.00245962	0.00271853	0.00349525	0.00466033	0.00323634	0.00284798	0.00310689	0.00608432	0.0033658
C20:3-OH/C18:3-DC	0.00271853	0.0036247	0.00207126	0.00129454	0.00517815	0.00181235	0	0.00207126	0.000776722	0.000776722	0.0016829	0.00207126	0.00194181	0.00310689	0.00181235
C20:2-OH/C18:2-DC	0.00504869	0.00660214	0.00608432	0.00802613	0.00621378	0.00621378	0.00388361	0.00504869	0.00310689	0.00414252	0.00543706	0.00504869	0.00647268	0.00595487	0.0053076
C20:1-OH/C18:1-DC	0.00245962	0.00569596	0.00427197	0.00634323	0.00427197	0.00258907	0.00297744	0.00155344	0.00466033	0.00181235	0.00453088	0.00349525	0.00440143	0.0036247	0.00401306
C20-OH/C18-DC/C22:6	0.0151461	0.0179941	0.0117803	0.0102268	0.019677	0.0133337	0.0107447	0.00569596	0.00996794	0.00957957	0.00634323	0.00880285	0.0116508	0.00478979	0.00621378
C22:5	0.0106152	0.0124276	0.00556651	0.00711995	0.00789668	0.00517815	0.00427197	0.00207126	0.00543706	0.00220071	0.00427197	0.00517815	0.00608432	0.00284798	0.00155344
C22:4	0.00957957	0.0100974	0.0086734	0.00828504	0.00517815	0.00543706	0	0.00310689	0.00621378	0.00233017	0.00245962	0.00271853	0.00491924	0.00194181	0.00284798
C22:3	0.00245962	0	0.00142399	0.00220071	0.00142399	0.00245962	0	0	0.00103563	0	0	0.000647269	0	0	0
C22:2	0	0	0.00116508	0.00155344	0	0	0	0	0	0.000906176	0	0	0	0	0.000647269

## Sheet: Figure 5
Panel B - Plasma amino acids (normalized for heat map)
	30 min no treatment					30 min 1% isoflurane					30 min 1.5% isoflurane
Gly	0.967623	0.988628	0.989593	1.11228	0.941876	1.01919	1.28482	0.901636	1.06405	1.02026	0.920149	1.0821	1.15126	1.04226	0.90283
Ala	0.856921	0.853232	1.33794	1.01008	0.941826	1.77155	1.48918	1.37277	1.99833	1.58061	1.6303	1.84168	1.64873	1.68582	1.3619
Ser	1.02614	0.998671	1.10867	0.94028	0.92624	0.987494	0.850221	0.748018	1.11677	0.855119	0.885438	0.98467	0.851527	0.915921	0.939057
Pro	1.10937	0.939047	1.11145	0.983168	0.856962	1.16944	0.739815	0.78342	1.09899	0.924433	0.952922	1.15948	0.899679	0.980249	1.16381
Val	1.2163	0.84416	1.03429	1.02944	0.875809	0.978296	0.646905	0.652217	0.978942	0.901254	0.85411	1.04016	0.76375	0.903805	0.998125
Leu/Ile	1.07494	1.05969	0.890437	1.00793	0.967009	0.76301	0.861059	0.820713	0.94027	0.732397	0.7511	0.860006	0.951226	0.86886	0.830129
Met	0.927284	1.02824	1.09203	1.04809	0.90436	0.794126	0.845119	0.931757	0.871819	0.798334	0.869759	0.887818	0.872539	0.969297	1.04308
His	0.996085	1.06047	1.0153	0.971478	0.956666	0.826045	1.11164	0.946005	0.958688	0.869455	0.843604	0.877075	0.943	0.998907	1.05883
Phe	1.02568	1.0379	0.967327	0.955773	1.01332	0.595748	0.996844	0.690917	0.649262	0.628422	0.614912	0.655195	0.73632	0.715085	1.03765
Tyr	1.23629	0.964887	1.03413	0.97933	0.785358	1.02418	0.743024	0.584715	0.976292	0.856885	0.921719	1.08773	0.731147	1.02704	1.32635
Asx	0.937326	0.871759	1.0093	1.21731	0.964309	0.773408	0.921701	0.578694	0.82944	0.803169	0.800546	1.00502	0.805536	0.950495	0.872926
Glx	0.821968	0.824316	1.16857	1.24046	0.944685	0.521977	0.581098	0.399132	0.531197	0.56777	0.556286	0.677068	0.611993	0.567985	0.605699
Orn	1.29275	0.803428	1.09504	0.983762	0.825018	0.904711	0.645247	0.554207	0.826022	0.804868	0.766882	0.992739	0.584919	0.839914	1.02255
Cit	1.09654	1.00541	0.954313	0.992322	0.951418	0.777021	0.784959	0.741282	0.716829	0.86135	0.812387	0.835145	0.770746	0.804247	0.952521
Arg	1.43551	0.875137	0.915287	0.948171	0.825897	0.585832	0.759512	0.525584	0.684719	0.772171	0.797337	0.980127	0.627902	0.787784	1.43123
Panel C - Plasma Alanine - uM (all shown - only alanine in figure)
	30 min no treatment					30 min 1% isoflurane					30 min 1.5% isoflurane
Ala	480.378	478.31	750.033	566.235	527.975	993.107	834.817	769.558	1120.24	886.069	913.925	1032.42	924.256	945.045	763.462
Panel D - Liver amino acids (normalized for heat map)
	30 min no treatment					30 min 1% isoflurane					30 min 1.5% isoflurane
Gly	1.12177	0.980771	0.965123	0.995565	0.936765	1.053	0.693571	0.706759	0.910902	0.882441	1.12181	1.00377	0.923543	0.952892	0.89457
Ala	1.11454	0.718786	1.33318	1.05205	0.781445	1.76082	1.28458	1.12332	2.19657	1.20499	2.90034	2.97284	1.76645	2.16834	2.07508
Ser	1.20753	0.980096	1.04311	0.898248	0.871017	1.00055	0.789529	0.906881	1.05764	1.02747	1.09438	1.2166	0.94178	1.21699	1.00373
Pro	1.41696	0.748494	1.09644	1.01798	0.720124	0.956912	0.380968	0.571011	0.921562	0.628032	1.36089	1.3091	0.949631	1.0288	1.21634
Val	1.18947	0.998806	0.907426	1.02581	0.878489	0.958056	0.55438	0.754879	0.969078	0.845467	0.943565	0.984578	0.865271	0.876293	0.858421
Leu/Ile	1.08868	0.966177	0.940963	1.0393	0.964886	0.774611	0.710915	0.746365	1.02525	0.795562	0.844309	0.821077	0.913168	0.878558	0.80916
Met	0.944601	1.03371	0.97659	0.990563	1.05454	1.07293	1.01397	1.26903	0.994239	1.09548	1.29991	1.13139	1.06913	1.45018	1.1184
His	1.0605	1.03399	1.01723	1.00013	0.888154	0.849014	0.683029	0.878981	1.0059	0.851745	1.16207	1.01558	0.981101	1.11952	1.16687
Phe	1.04592	0.894028	0.947624	1.07961	1.03282	0.646648	0.641149	0.681146	0.674446	0.709843	0.570954	0.567055	0.676746	0.579054	0.778938
Tyr	1.07695	1.02133	0.964058	1.10275	0.834913	0.901664	0.59938	0.609272	0.932031	0.648285	0.949047	1.01158	0.869361	1.0362	1.39998
Asx	0.944529	0.813894	1.26197	1.0713	0.908304	2.07146	1.99487	2.7373	2.32327	2.03463	4.51052	3.68961	2.55917	4.25998	4.32102
Glx	1.03182	0.973347	1.05354	0.992106	0.94919	0.977958	0.737555	0.893342	0.919593	0.819138	1.14078	1.08055	0.797621	0.995277	1.16282
Orn	1.7604	0.730189	0.953282	0.912618	0.643513	0.79172	0.487945	0.475335	0.638539	0.740983	1.32861	1.34202	0.790054	1.06192	1.49746
Cit	1.59248	0.887751	1.05224	0.836941	0.63059	0.58652	0.40687	0.390668	0.448607	0.481918	0.83059	0.754375	0.560855	0.766688	0.738432
Arg	1.63639	0.719678	0.898587	0.994159	0.751189	0.606907	0.604137	0.705827	0.516875	0.74865	1.06896	1.07946	0.580128	0.759846	1.27626
Panel E-F -Liver Alanine and ASX
Liver Alanine Control	Liver Alanine 1% Iso	Liver Alanine 1.5% Iso
64.739	102.279	168.469
41.751	74.616	172.68
77.439	65.249	102.606
61.109	127.59	125.95
45.391	69.993	120.533
Liver ASX Control	Liver ASX 1% Iso	Liver ASX 1.5% Iso
52.872	115.954	252.486
45.559	111.667	206.534
70.642	153.226	143.255
59.968	130.05	238.462
50.844	113.893	241.878
Panel G - Heat map of glycolysis intermediates fasted and 1% iso
	30 min fasted (control)				30 min 1% Isoflurane
Glucose	1.12693	1.36626	0.0253232	1.48148	0.971969	0.842685	1.13252	0.991374
Glucose-6P	0.727815	1.06948	0.926101	1.2766	1.75653	0.829538	1.06181	7.45916
Fructose-6P	0.775331	0.968773	1.46763	0.788266	1.05047	0.705686	0.926475	3.30158
F-1,6BP/G-1,6-BP	0.617151	0.552669	2.24517	0.585006	0.728727	0.676689	1.24392	0.840059
Ribose-5P	0.814258	1.19558	0.889787	1.10037	1.02715	1.1645	1.11853	1.18668
G-3P	0.153561	0.257211	1.96577	1.62346	0.427403	0.306353	0.613567	0.42323
DHAP	0.854912	0.5699	2.16296	0.412227	0.730862	0.708343	1.23743	0.670269
G-2,3P	0.948533	0.906897	0.949968	1.1946	0.479815	0.919396	0.884278	0.724429
PEP	0.998233	0.962433	0.855029	1.1843	0.53282	0.844195	0.745742	0.741503
Pyruvate	0.94042	1.08598	1.10752	0.866076	0.626368	1.08702	1.11343	1.19924
Lactate	0.250867	0.164511	2.81989	0.764729	1.14464	0.895104	0.97431	0.762626
Panel H - Lactate with outlier removed (see also Figure 5-figure supplement 1)
30 min Fasted	30 min 1% Isoflurane
0.250867	2.90984
0.164511	2.27548
0.764729	2.47684
	1.9387
2.81989	<- outlier by GRUBBS test - not in main text figure, presented in supplemental
Panel I - PEP
30 min Fasted	30 min 1% Isoflurane
0.998233	0.53282
0.962433	0.844195
0.855029	0.745742
1.1843	0.741503
Panel J - Pyruvate
30 min Fasted	30 min 1% Isoflurane
0.94042	0.626368
1.08598	1.08702
1.10752	1.11343
0.866076	1.19924
Panel K - Acetyl-CoA
30 min Fasted	30 min 1% Isoflurane
0.664399	1.09398
0.833531	1.10684
1.5033	1.02592
0.998766	0.743249
Panel L - Citrate
30 min Fasted	30 min 1% Isoflurane
1.12148	2.01408
1.06294	2.05766
0.78257	2.43662
1.03301	2.02905
Panel M - Isocitrate
30 min Fasted	30 min 1% Isoflurane
1.32485	1.8857
1.08587	2.3161
0.887921	3.36613
0.701361	2.33787
Panel N - alpha-ketoglutarate
30 min Fasted	30 min 1% Isoflurane
0.986886	0.981551
1.312	0.59065
0.978588	0.695266
0.722531	1.69193
Panel O - Succinate
30 min Fasted	30 min 1% Isoflurane
0.850529	2.93169
1.49643	1.05916
0.589883	1.30437
1.06316	6.52758
Panel P - Fumarate
30 min Fasted	30 min 1% Isoflurane
1.20353	1.14903
1.21794	1.09474
0.538289	1.18662
1.04025	1.29102
Panel Q - Malate
30 min Fasted	30 min 1% Isoflurane
1.10984	0.918471
1.21723	1.05825
0.539684	1.26462
1.13324	1.25562

## Sheet: Figure 5-figure supplement 1
Panel A - Glucose
30 min Fasted	30 min 1% Isoflurane
1.12693	0.971969
1.36626	0.842685
0.0253232	1.13252
1.48148	0.991374
Panel B - G-6P
30 min Fasted	30 min 1% Isoflurane
0.727815	1.75653
1.06948	0.829538
0.926101	1.06181
1.2766	7.45916	<- outlier by GRUBBS test
Panel C - F-6P
30 min Fasted	30 min 1% Isoflurane
0.775331	1.05047
0.968773	0.705686
1.46763	0.926475
0.788266	3.30158
Panel D - F/G-1,6BP
30 min Fasted	30 min 1% Isoflurane
0.617151	0.728727
0.552669	0.676689
2.24517	1.24392
0.585006	0.840059
Panel E - Ribose-5P
30 min Fasted	30 min 1% Isoflurane
0.409253	0.660567
0.61115	0.579588
0.959115	0.731543
2.02048	0.738034
Panel F - G3P
30 min Fasted	30 min 1% Isoflurane
0.153561	0.427403
0.257211	0.306353
1.96577	0.613567
1.62346	0.42323
Panel G - DHAP
30 min Fasted	30 min 1% Isoflurane
0.854912	0.730862
0.5699	0.708343
2.16296	1.23743
0.412227	0.670269
Panel H - G-2,3P
30 min Fasted	30 min 1% Isoflurane
0.948533	0.479815
0.906897	0.919396
0.949968	0.884278
1.1946	0.724429
Panel I - Lactate
30 min Fasted	30 min 1% Isoflurane
0.250867	2.90984
0.164511	2.27548
0.764729	2.47684
	1.9387
2.81989	<- outlier by GRUBBS test

[truncated: 5 more sheets: Figure 6, Figure 6-figure supplement 1, Figure 6-figure supplement 2, Figure 6-figure supplement 3, Figure 6-figure supplement 4]
