# Supplementary figures and images for: Mechanisms underlying neonate-specific metabolic effects of volatile anesthetics
Source: eLife journal article supplement (doi:10.7554/elife.65400), 2021-07-13

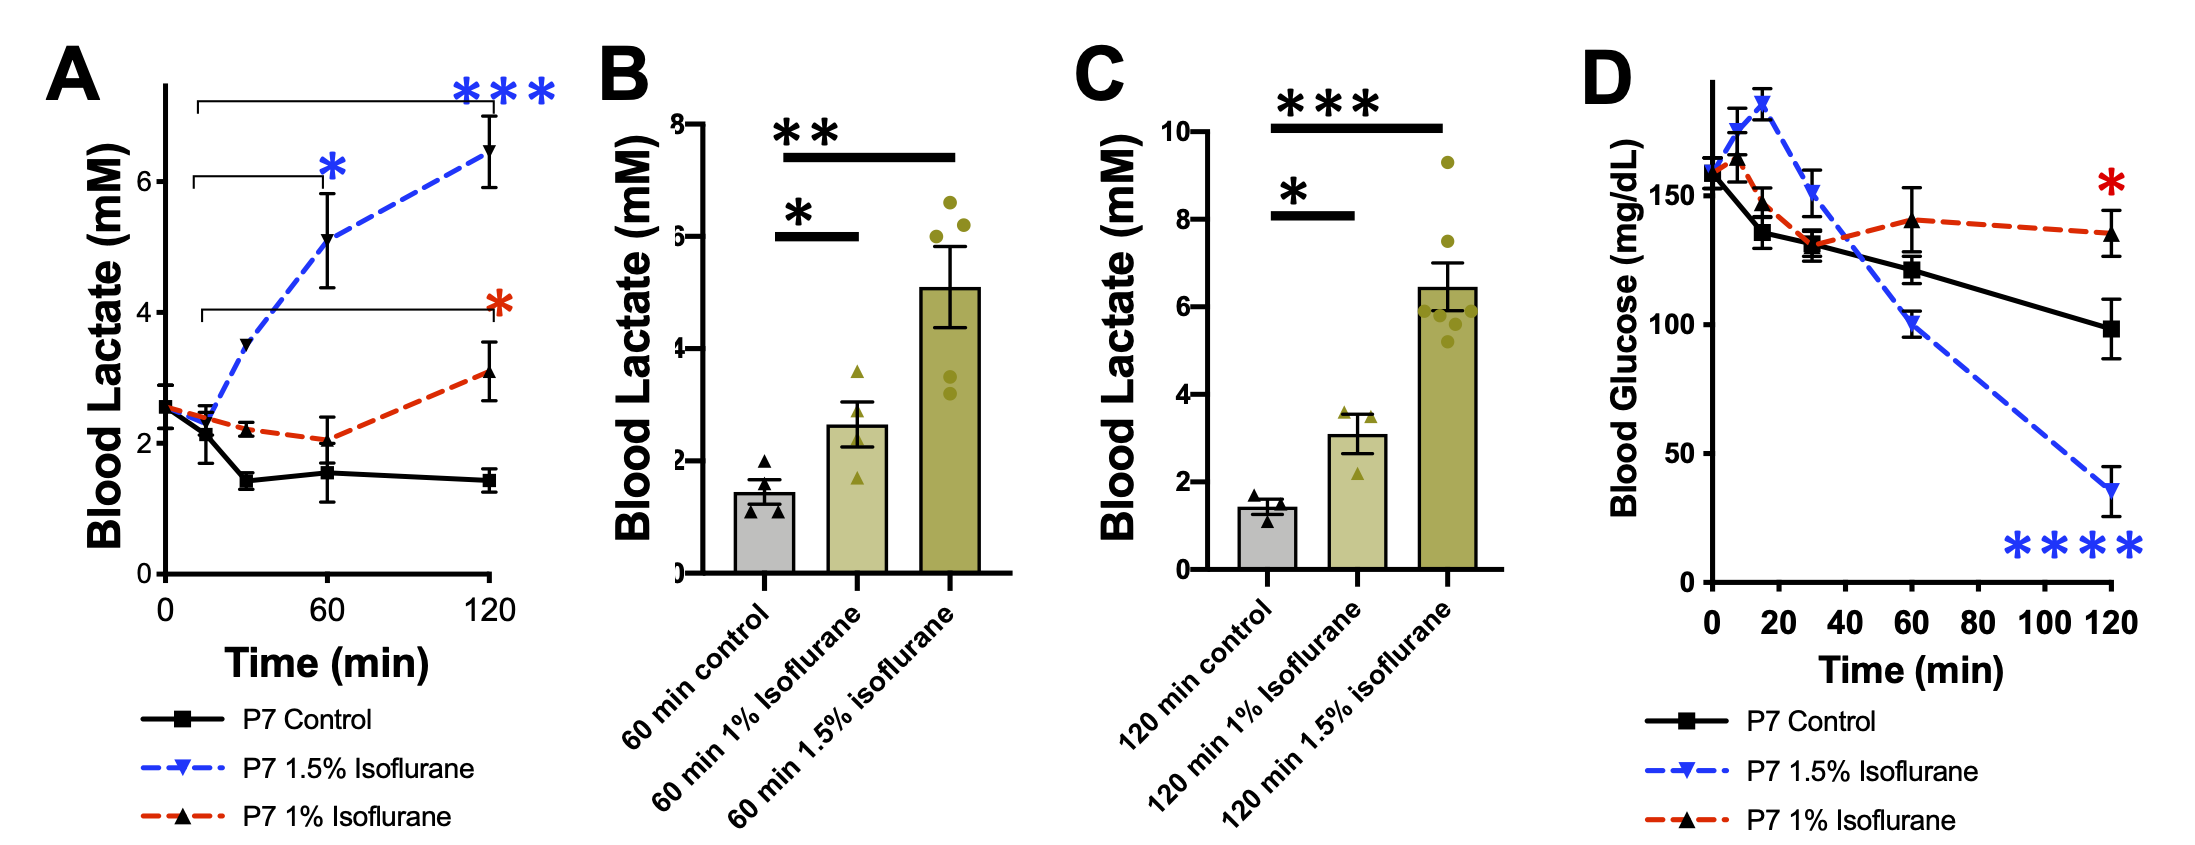

Supplement: supp [file elife-65400-supp-v1.zip › elife_poa_e65400_Figure_1_figure_supplement_1.tif]

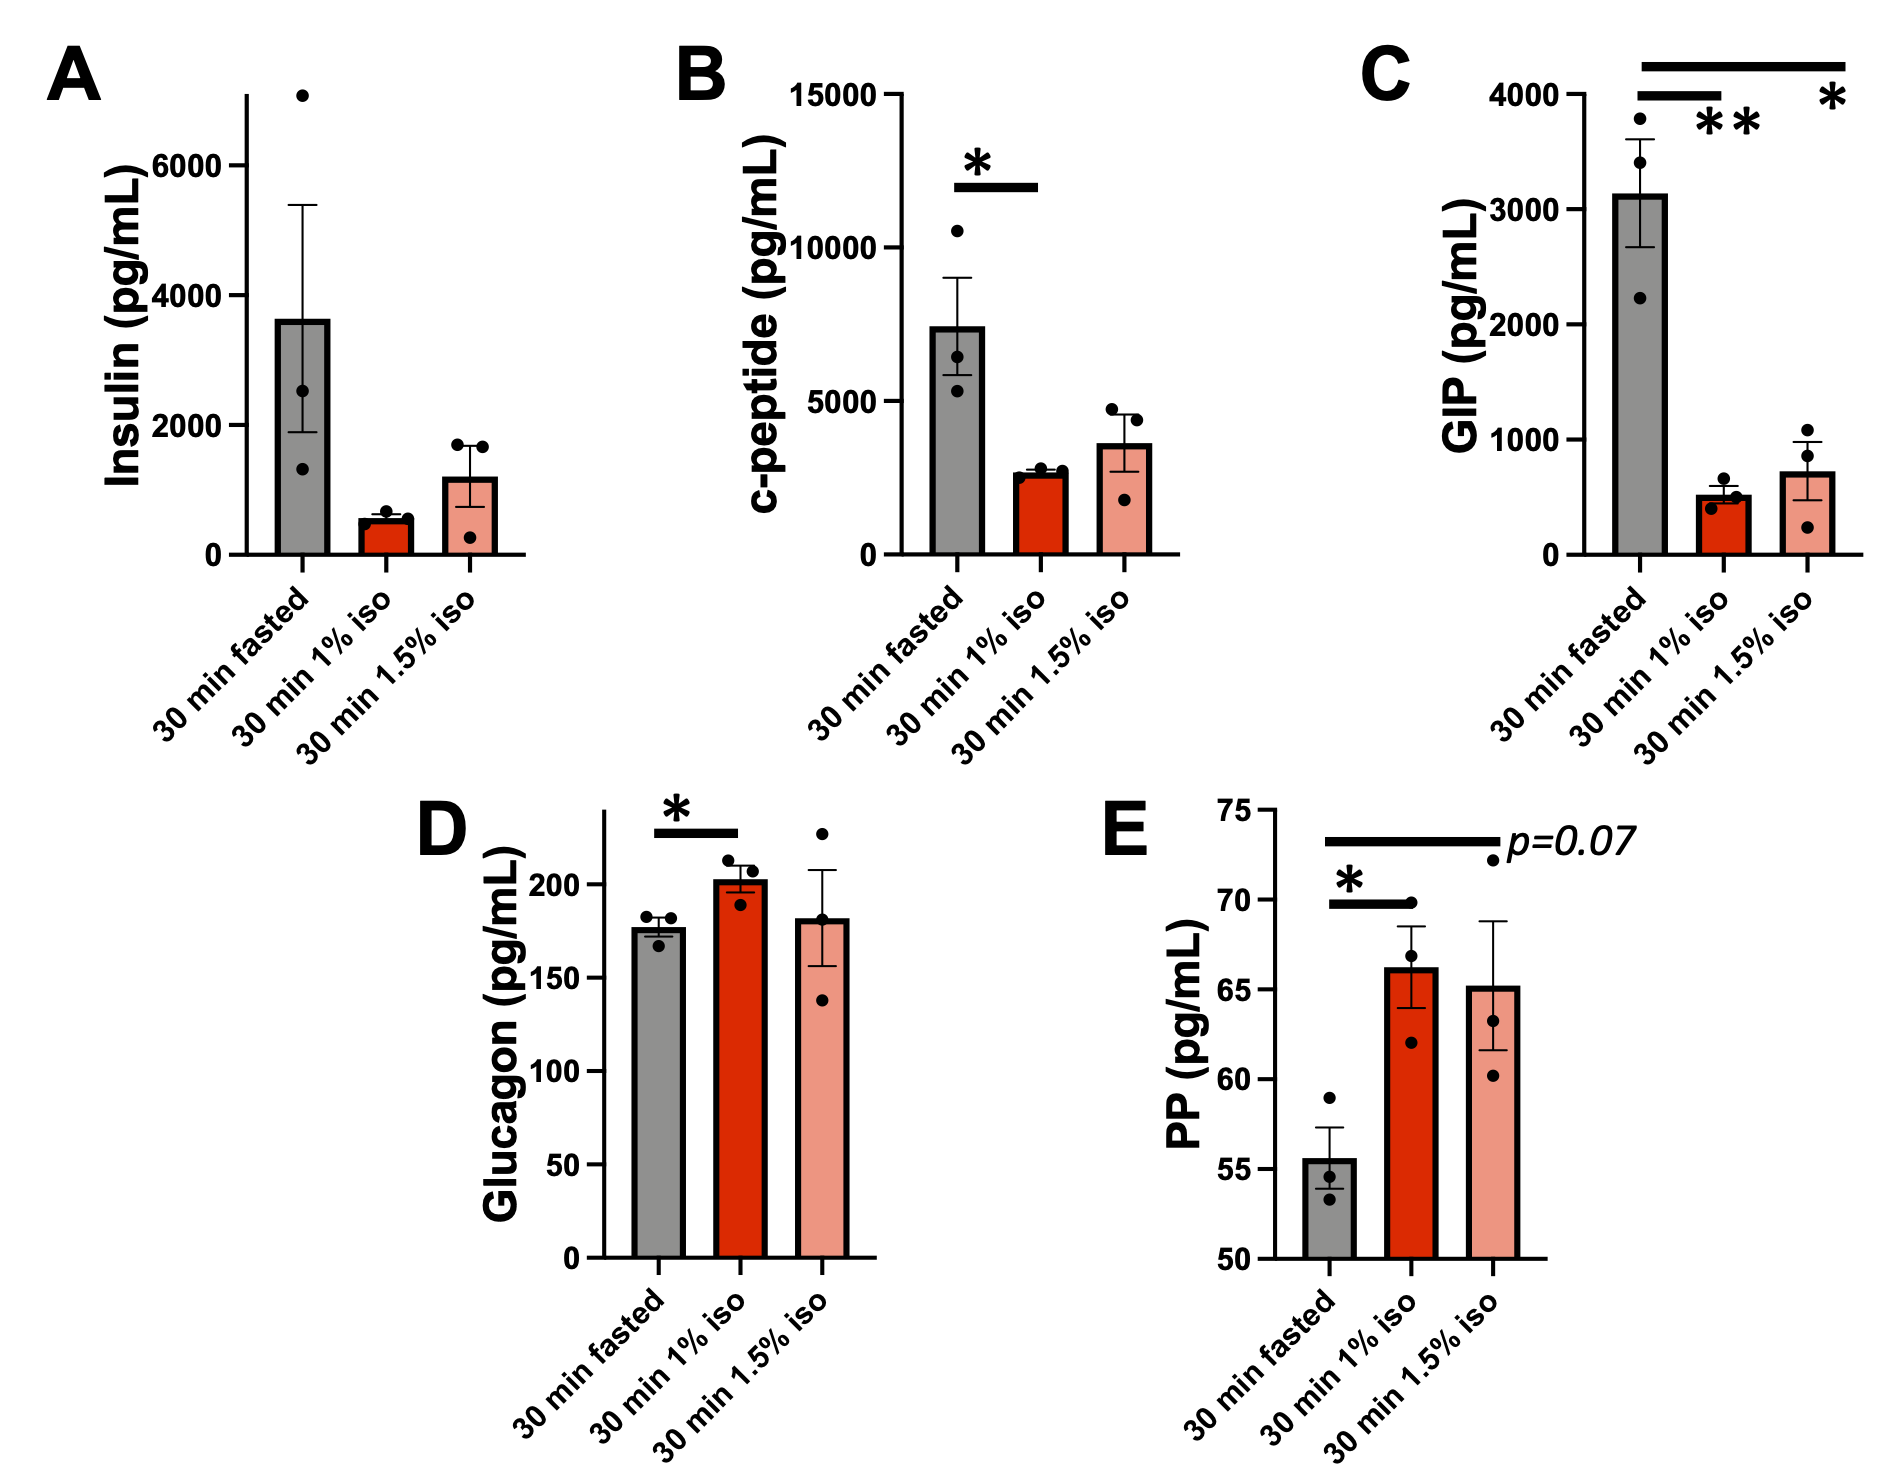

Supplement: supp [file elife-65400-supp-v1.zip › elife_poa_e65400_Figure_1_figure_supplement_2.tif]

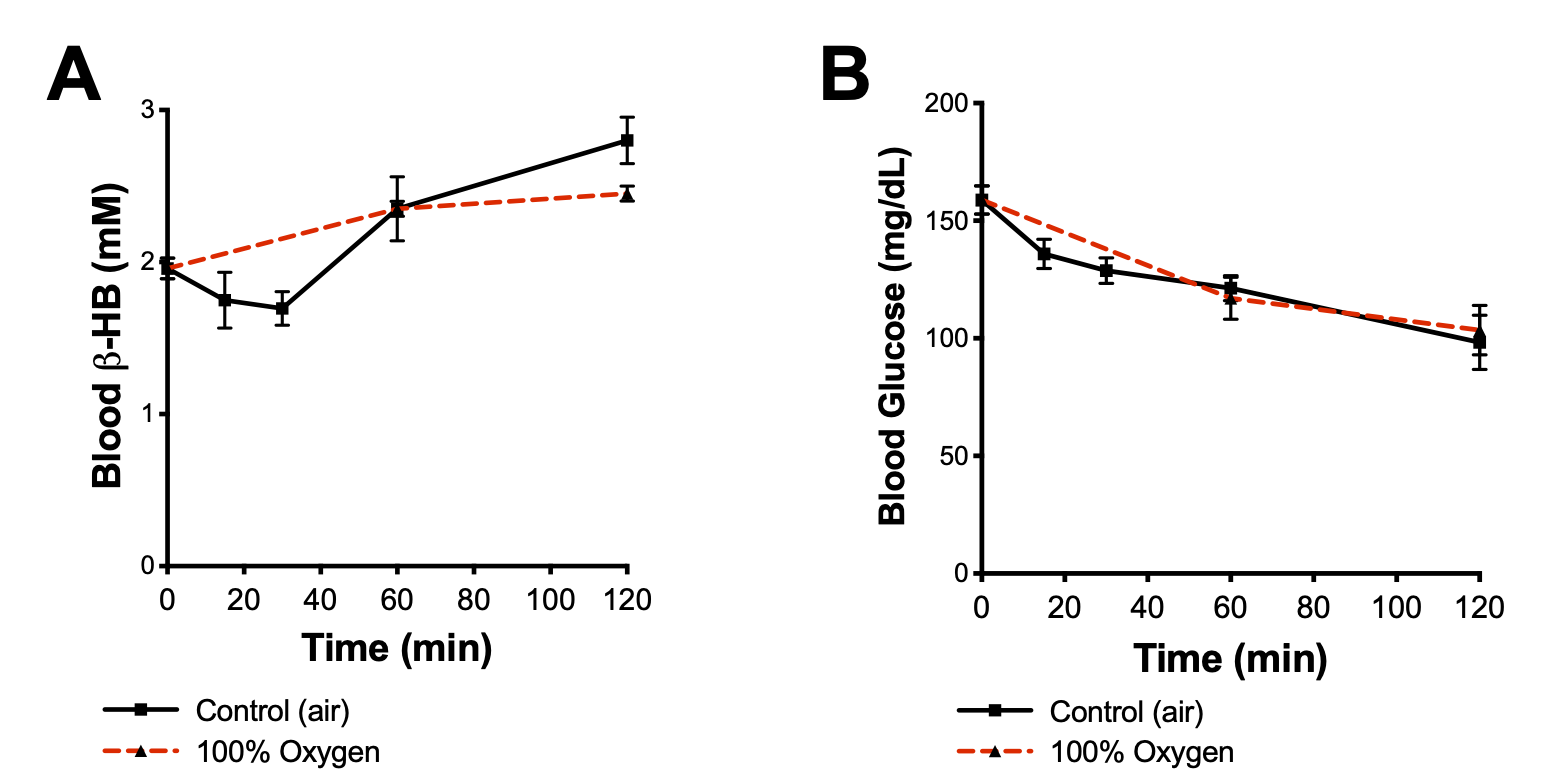

Supplement: supp [file elife-65400-supp-v1.zip › elife_poa_e65400_Figure_1_figure_supplement_3.tif]

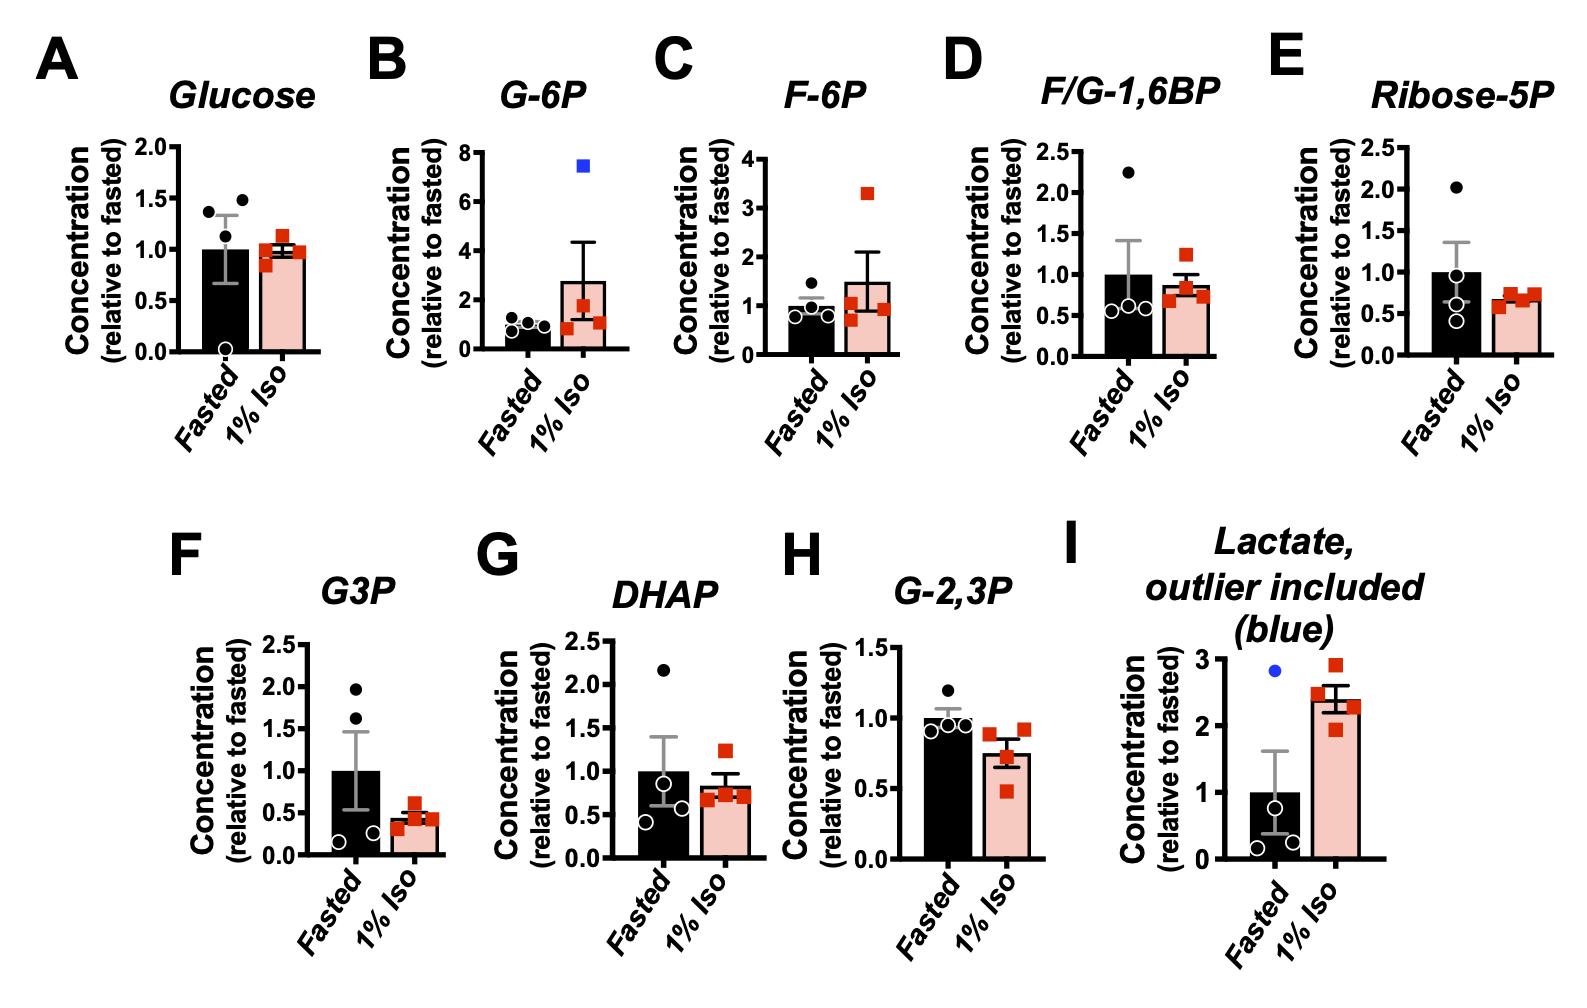

Supplement: supp [file elife-65400-supp-v1.zip › elife_poa_e65400_Figure_5_figure_supplement_1.tif]

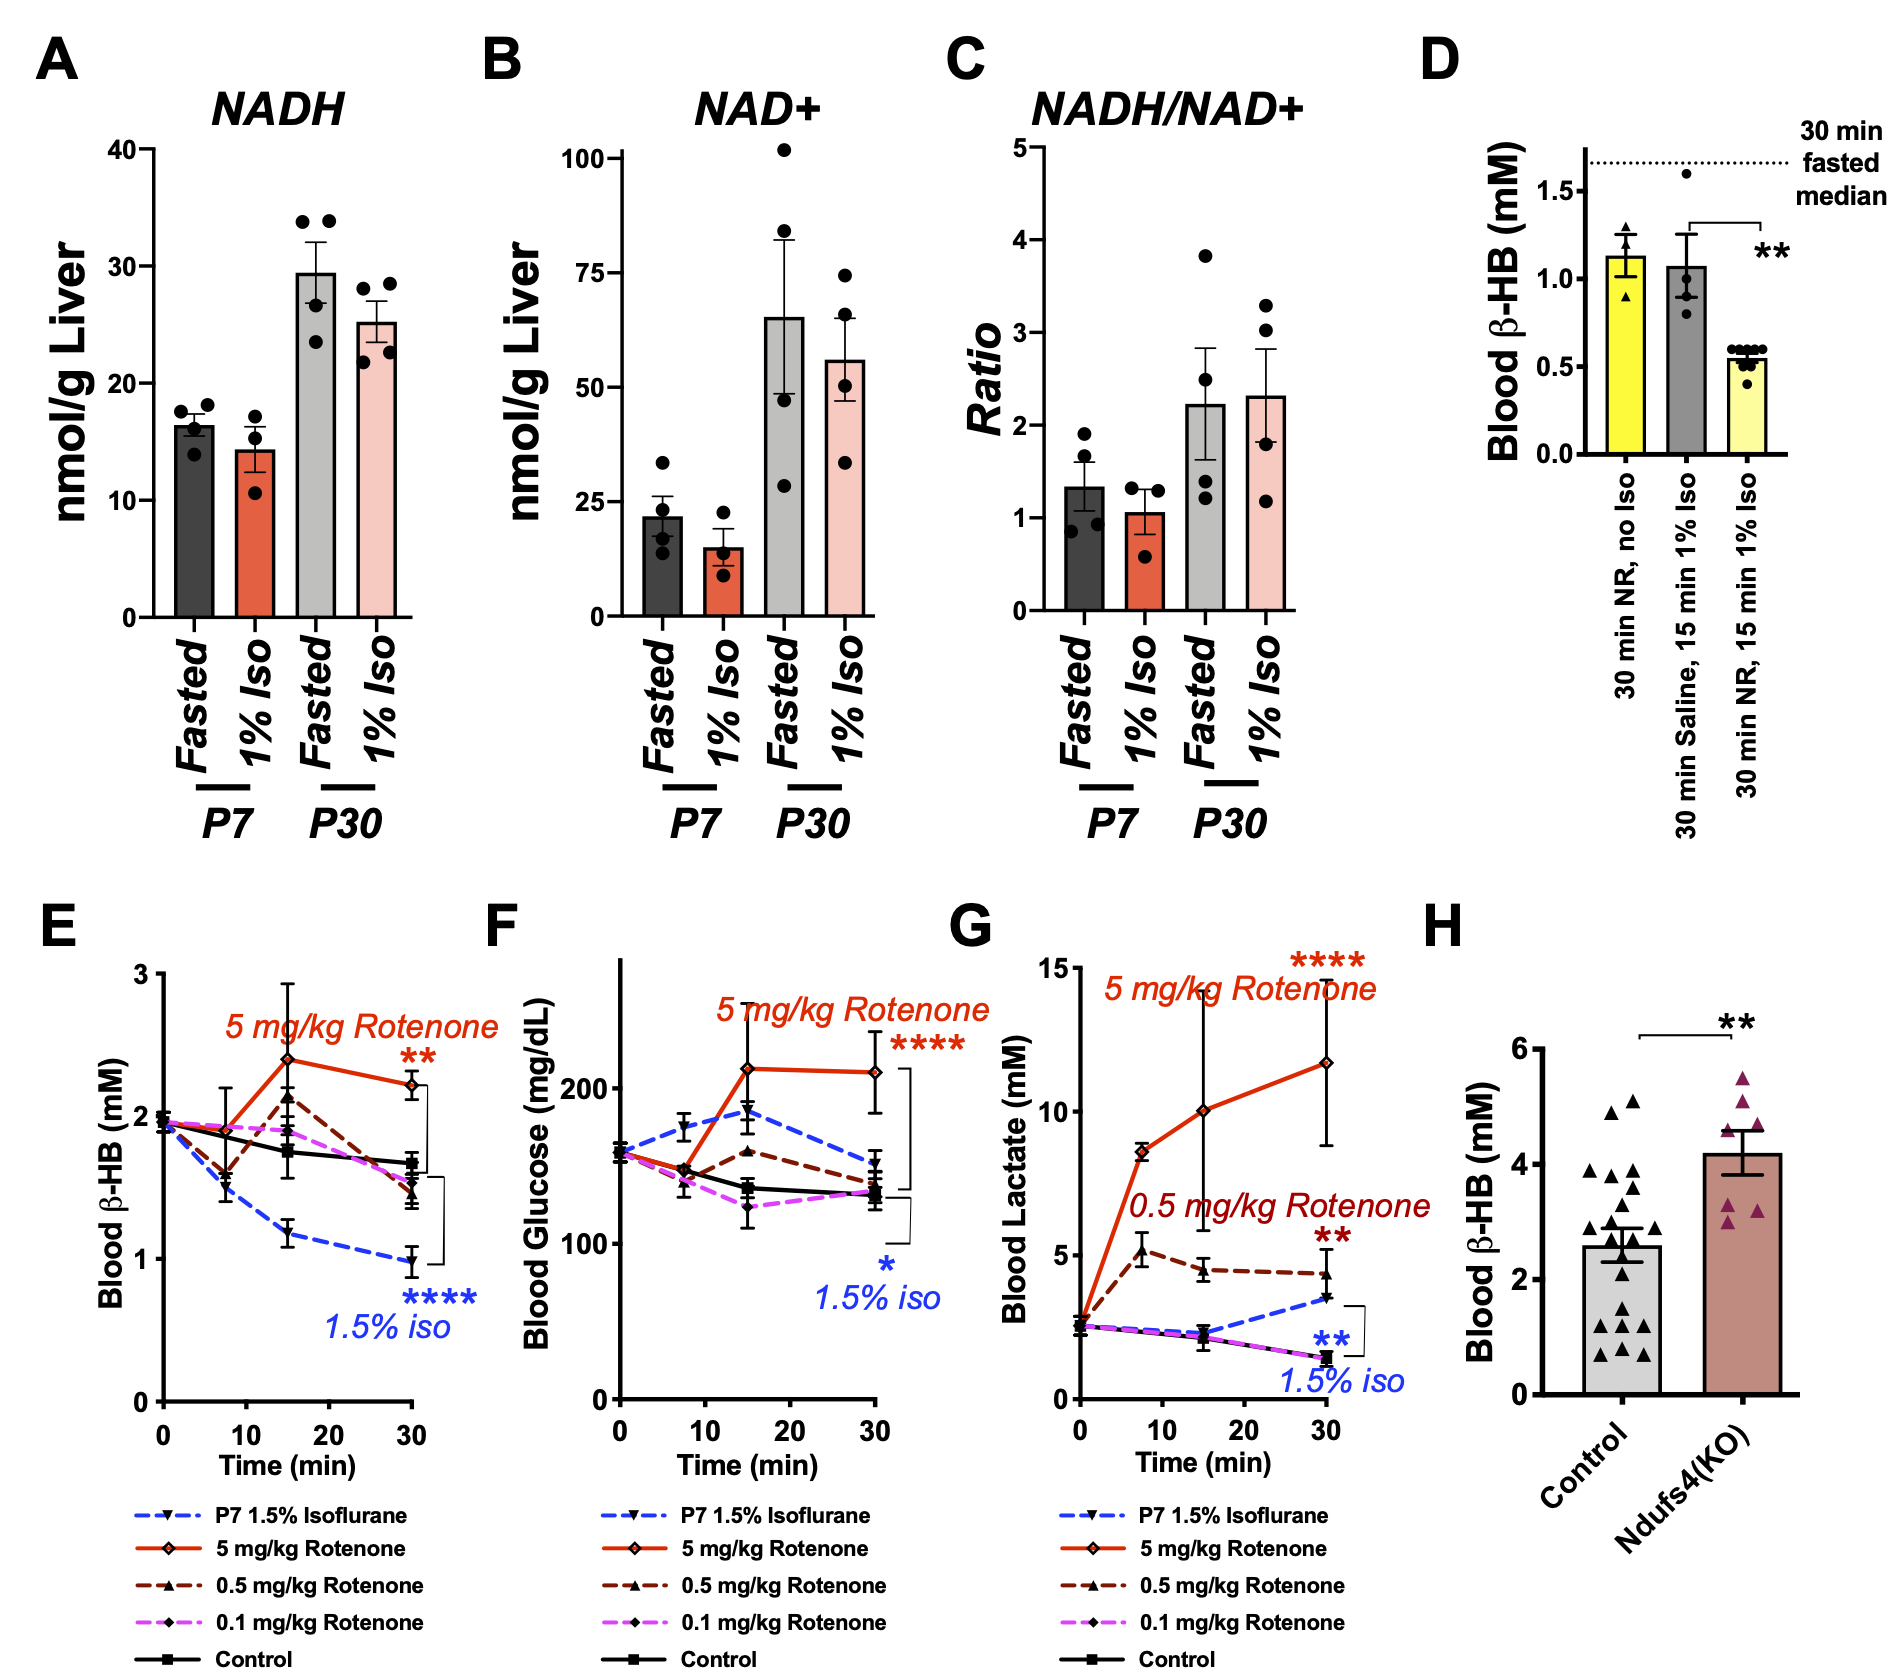

Supplement: supp [file elife-65400-supp-v1.zip › elife_poa_e65400_Figure_6_figure_supplement_1.tif]

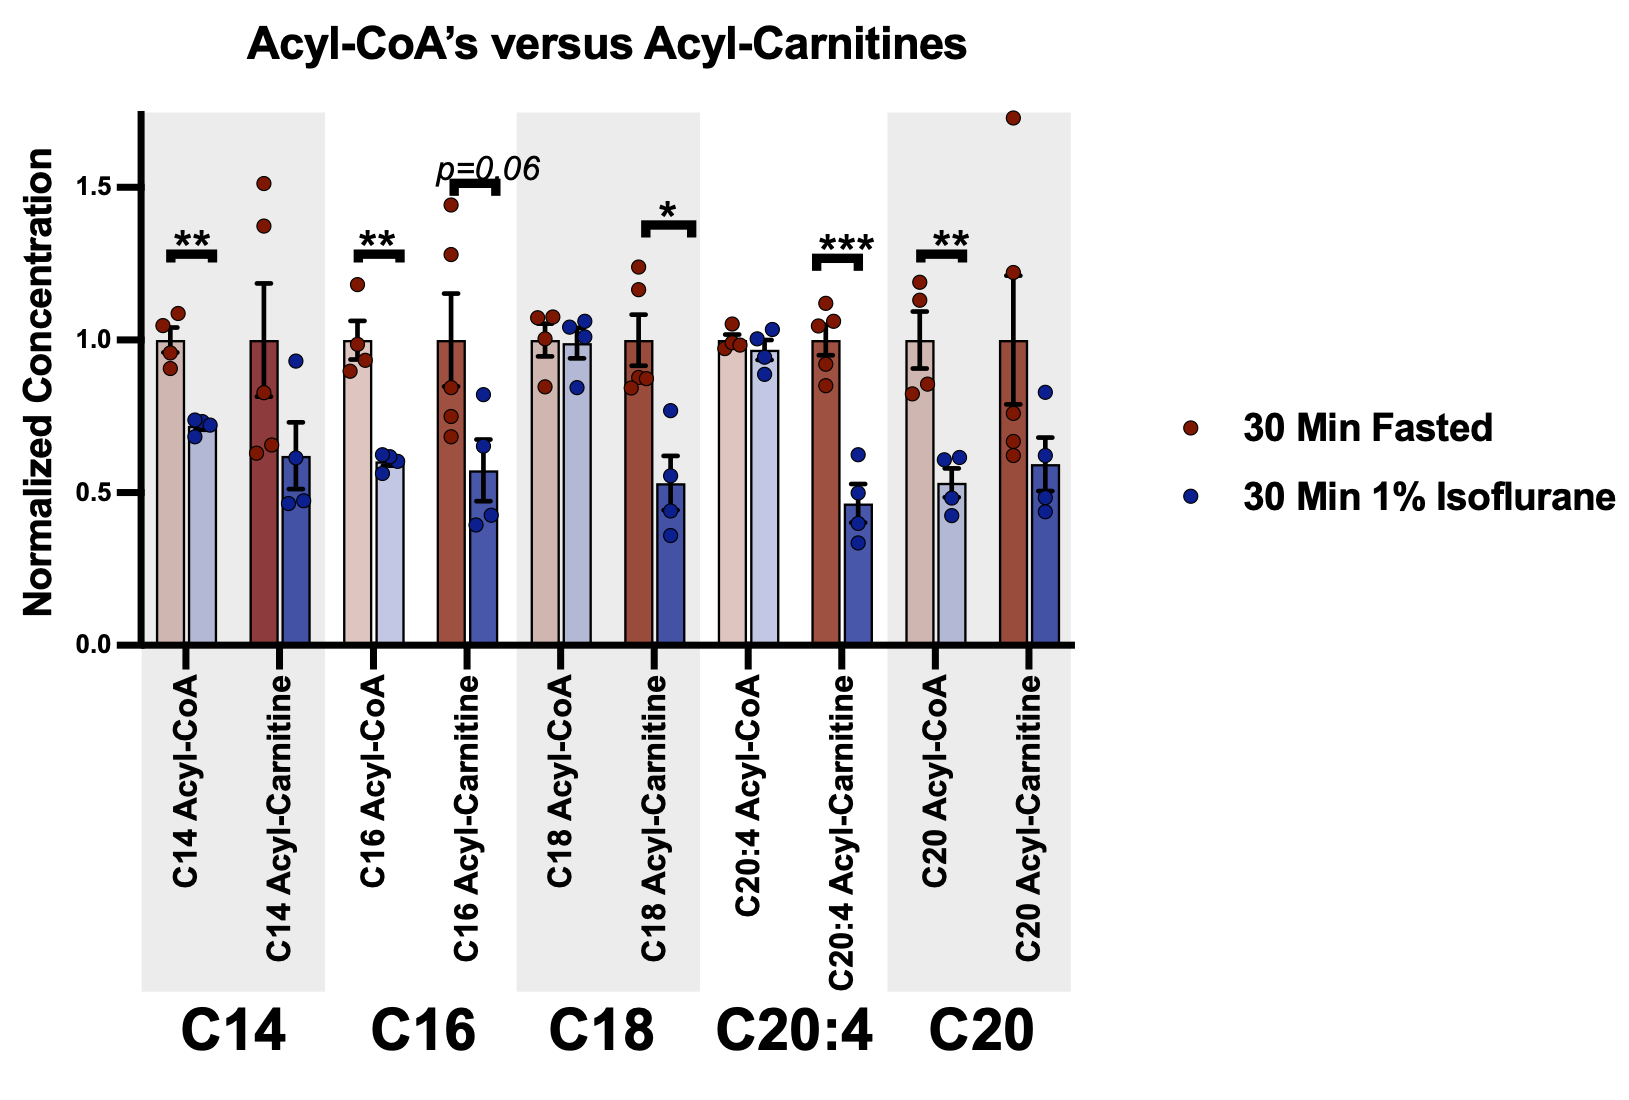

Supplement: supp [file elife-65400-supp-v1.zip › elife_poa_e65400_Figure_6_figure_supplement_2.tif]

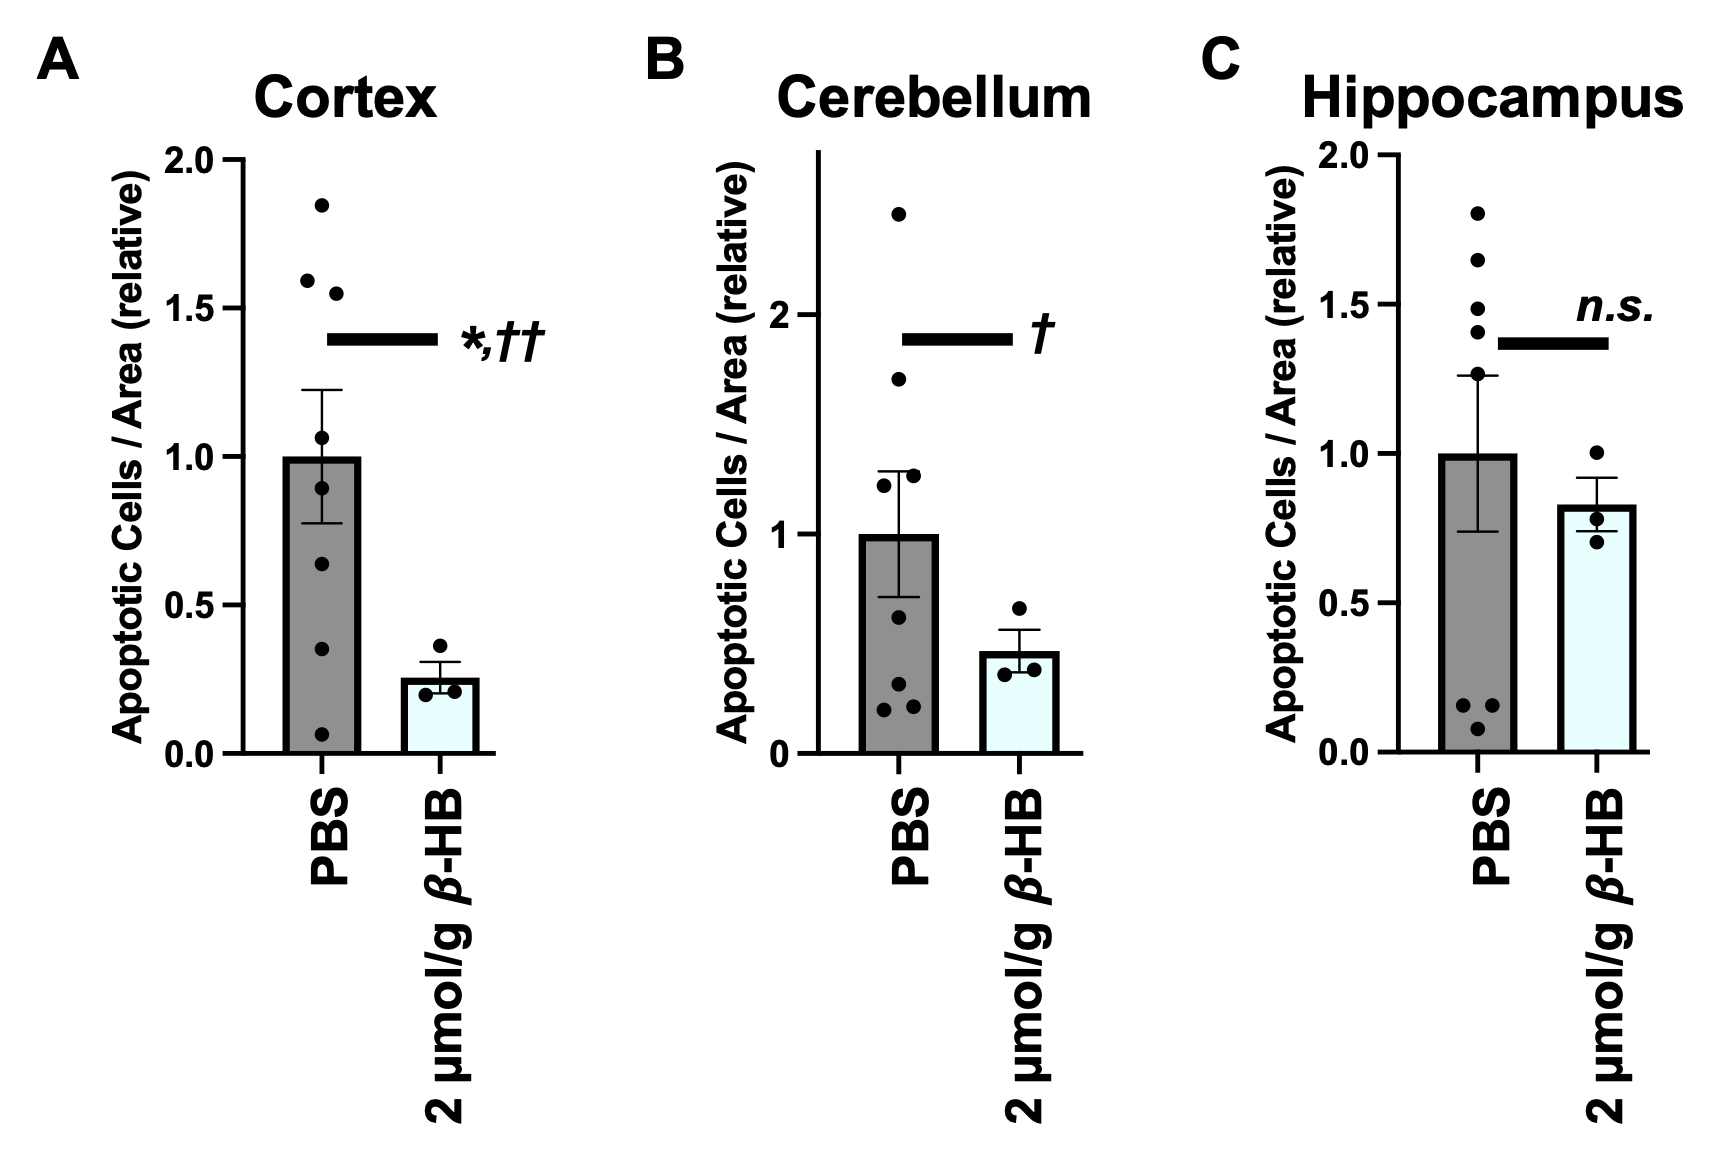

Supplement: supp [file elife-65400-supp-v1.zip › elife_poa_e65400_Figure_6_figure_supplement_3.tif]

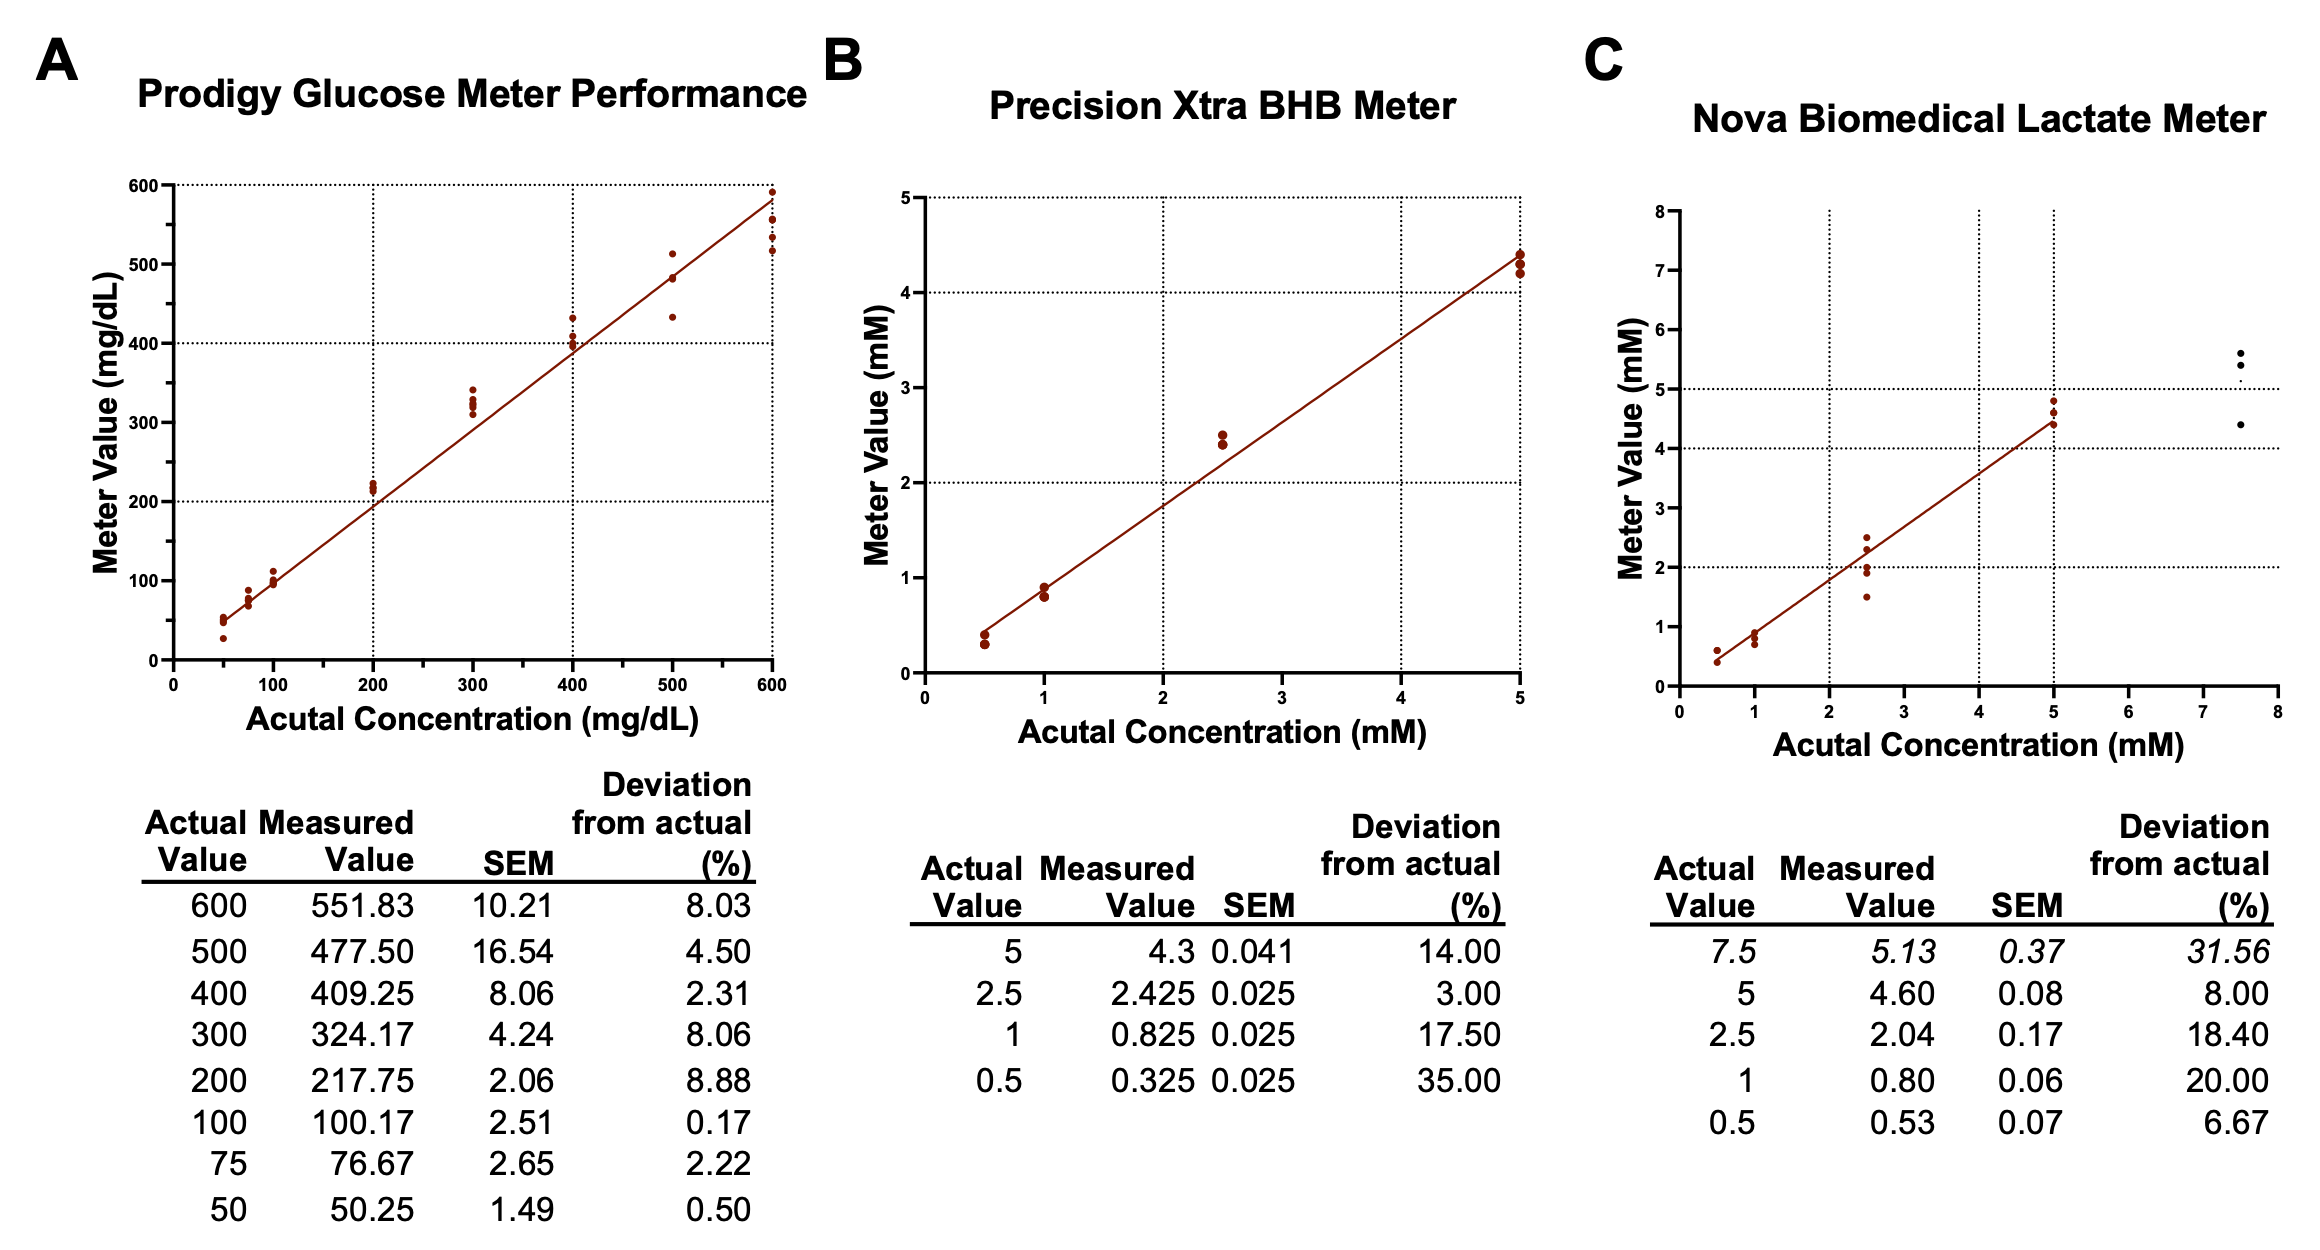

Supplement: supp [file elife-65400-supp-v1.zip › elife_poa_e65400_Figure_6_figure_supplement_4.tif]
